# Supplementary material for: Chemical Constituents and Anticancer Activities of the Extracts from Phlomis × commixta Rech. f. (P. cretica × P. lanata)
Source: MDPI journal article supplement (doi:10.3390/ijms25020816), 2024-01-09
Supplement: s1 [file s1]

## Supporting Information

### **Chemical constituents and anti-cancer activities of the extracts from *Phlomis* × *commixta* Rech. f. (*P. cretica* × *P. lanata*)**

**Michalis K. Stefanakis <sup>1</sup>, Olga S. Tsiftoglou <sup>2</sup>, Pavle Z. Mašković <sup>3</sup>, Diamanto Lazari <sup>2\*</sup> and Haralambos E. Katerinopoulos <sup>1</sup>**

<sup>1</sup> Department of Chemistry, University of Crete, 71003, Voutes, Heraklion, Crete, Greece; michstefanakis@yahoo.gr (M.K.S); katerinc@uoc.gr (H.E.K)

<sup>2</sup> Laboratory of Pharmacognosy, Faculty of Health Sciences, School of Pharmacy, Aristotle University of Thessaloniki, 54124 Thessaloniki, Greece; olga@tsiftoglou.gr (O.S.T); dlazari@pharm.auth.gr (D.L)

<sup>3</sup> Department of Food Technology, Faculty of Agronomy, University of Kragujevac, Cara Dušana 34, 32000 Čačak, Republic of Serbia; pavlemaskovic@yahoo.com (P.Z.M)

**Table S1:** NMR spectroscopic data of metabolite (**1**) 3-O- $\beta$ -(3R)-D-apiofuranosyl- (1 $\rightarrow$ 6)-O- $\beta$ -D-glucopyranosyl-(3S)-oct-1-en-3-ol, (CD<sub>3</sub>OD, 500 MHz).

| #            | <sup>13</sup> C | HSQC | DEPT<br>135     | $\delta^1\text{H}$ | Multiplicity, ( <i>J</i> , Hz)                     | COSY                     | TOCSY                                                            | NOESY                                           | HMBC                                    |
|--------------|-----------------|------|-----------------|--------------------|----------------------------------------------------|--------------------------|------------------------------------------------------------------|-------------------------------------------------|-----------------------------------------|
| Allylic part |                 |      |                 |                    |                                                    |                          |                                                                  |                                                 |                                         |
| 1            | 116.3           | H-1a | CH <sub>2</sub> | 5.21               | ddd,<br>$J_1 = 17.4, J_2 = 1.7, J_3 = 1.1$ Hz, 1H  | H-1b, H-2                | H-2, H-3, H-4a, H-4b, H-5a,<br>H-5b, H-6, H-7a, H-7b             | H-1b, H-2, H-3, H-4a,<br>H-4b, H-5a, H-5b, H-1' | H-3                                     |
|              |                 | H-1b |                 | 5.11               | ddd,<br>$J_1 = 10.4, J_2 = 1.7, J_3 = 0.9$ Hz, 1H  | H-1a, H-2                | H-2, H-3, H-4a, H-4b, H-5a,<br>H-5b, H-6, H-7a, H-7b             | H-1a, H-2                                       |                                         |
| 2            | 140.9           | H-2  | CH              | 5.86               | ddd,<br>$J_1 = 17.4, J_2 = 10.4, J_3 = 7.1$ Hz, 1H | H-1a, H-1b,<br>H-3       | H-1a, H-1b, H-3, H-4a, H-4b, H-5a,<br>H-5b, H-6, H-7a, H-7b      | H-1a, H-1b, H-3, H-1'                           | H-1a, H-3,<br>H-4a, H-4b                |
| 3            | 83.1            | H-3  | CH              | 4.08               | dd,<br>$J_1 = 13.1, J_2 = 7.1$ Hz, 1H              | H-2, H-4a,<br>H-4b       | H-1a, H-1b, H-2, H-4a, H-4b, H-5a,<br>H-5b, H-6, H-7a, H-7b, H-8 | H-1a, H-2, H-4a, H-4b,<br>H-5a, H-5b, H-1'      | H-1a, H-1b,<br>H-2, H-4a,<br>H-4b, H-1' |
| 4            | 35.8            | H-4a | CH <sub>2</sub> | 1.51               | m, 1H                                              | H-3, H-4b,<br>H-5a       | H-1a, H-1b, H-2, H-3, H-4b, H-5b,<br>H-5b, H-6, H-7a, H-7b, H-8  | H-2, H-3, H-4b, H-5b,<br>H-1'                   | H-3                                     |
|              |                 | H-4b |                 | 1.68               | dd, $J_1 = 10.2, J_2 = 5.9$ Hz, 1H                 | H-3, H-4a,<br>H-5a, H-5b | H-1a, H-1b, H-2, H-3, H-4a, H-5a,<br>H-5b, H-6, H-7a, H-7b, H-8  | H-2, H-3, H-4a, H-5b,<br>H-1'                   |                                         |
| 5            | 25.7            | H-5a | CH <sub>2</sub> | 1.39               | m, 1H                                              | H-4a, H-4b               | H-1a, H-1b, H-2, H-3, H-4a, H-4b,<br>H-5b, H-6, H-7a, H-7b, H-8  | H-3, H-4b, H-7                                  | H-3                                     |
|              |                 | H-5b |                 | 1.32               | m, 1H                                              | H-4b                     | H-1a, H-1b, H-2, H-3, H-4a, H-4b,<br>H-5a, H-6, H-7a, H-7b, H-8  | H-3, H-4a, H-4b                                 |                                         |
| 6            | 33.1            | H-6  | CH <sub>2</sub> | 1.31               | m, 2H                                              | H-5a                     | H-1a, H-1b, H-2, H-3, H-4a, H-4b,<br>H-5a, H-5b, H-7a, H-7b, H-8 | H-3, H-4a, H-4b                                 | H-5b, H-7a, H-8                         |

| #           | <sup>13</sup> C | HSQC  | DEPT<br>135     | δ <sup>1</sup> H | Multiplicity, (J, Hz)                                  | COSY         | TOCSY                                                           | NOESY                    | HMBC                                |
|-------------|-----------------|-------|-----------------|------------------|--------------------------------------------------------|--------------|-----------------------------------------------------------------|--------------------------|-------------------------------------|
| 7           | 23.7            | H-7a  | CH <sub>2</sub> | 1.33             | m, 1H                                                  | H-6, H-8     | H-1a, H-1b, H-2, H-3, H-4a, H-4b,<br>H-5a, H-5b, H-6, H-7b, H-8 | H-7b, H-8                | H-6, H-7a, H-8                      |
|             |                 | H-7b  |                 | 1.37             | m, 1H                                                  | H-6, H-8     | H-1a, H-1b, H-2, H-3, H-4a, H-4b,<br>H-5a, H-5b, H-6, H-7a, H-8 | H-7a, H-8                |                                     |
| 8           | 14.4            | H-8   | CH <sub>3</sub> | 0.90             | t, J = 7.0 Hz, 3H                                      | H-7a, H- 7b  | H-3, H-4a, H-4b, H-5a, H-5b, H-6,<br>H-7a, H-7b                 | H-7a, H-7b               | H-7a                                |
| β-D-Glucose |                 |       |                 |                  |                                                        |              |                                                                 |                          |                                     |
| 1'          | 103.3           | H-1'  | CH              | 4.29             | d, J = 7.8 Hz, 1H                                      | H-2'         | H-2', H-3a', H-3b', H-4', H-5',<br>H-6a'                        | H-3, H-2', H-3', H-4'    | H-3, H-2', H-3', H-4a, H-4b,<br>H-2 |
| 2'          | 75.3            | H-2'  | CH              | 3.17             | dd, J <sub>1</sub> = 7.8, J <sub>2</sub> = 4.2, 1H     | H-1'         | H-1', H-3a', H-3b', H-4', H-5',<br>H-6a'                        | H-1', H-3a', H-3b'       | H-1'                                |
| 3'          | 76.8            | H-3'  | CH              | 3.34             | m, 1H                                                  | H-2', H-4'   | H-1', H-2', H-4', H-5', H-6a', H-6b'                            | H-1', H-6a', H-6b'       | H-1', H-4'                          |
| 4'          | 71.7            | H-4'  | CH              | 3.25             | dd, J <sub>1</sub> = 8.7, J <sub>2</sub> = 1.0 Hz, 1H  | H-5'         | H-1', H-2', H-3a', H-3b', H-5',<br>H-6a', H-6b'                 | H-1', H-2', H-6a', H-6b' | H-3', H-5'                          |
| 5'          | 78.2            | H-5'  | CH              | 3.33             | m, 1H                                                  | H-4', H-6a'  | H-1', H-2', H-3b', H-3b', H-4',<br>H-6a', H-6b'                 | H-1', H-6a', H-6b'       | H-2', H-4a',<br>H-5'                |
| 6'          | 68.4            | H-6a' | CH <sub>2</sub> | 3.56             | dd, J <sub>1</sub> = 11.2, J <sub>2</sub> = 5.2 Hz, 1H | H-6b'        | H-4', H-5', H-6b'                                               | H-1'', H-6b'             | H-4'                                |
|             |                 | H-6b' |                 | 3.92             | dd, J <sub>1</sub> = 11.2, J <sub>2</sub> = 1.8 Hz, 1H | H-6a', H-1'' | H-5'                                                            | H-3', H-5', H-6a', H-1'' | H-1''                               |
| β-D-Apiose  |                 |       |                 |                  |                                                        |              |                                                                 |                          |                                     |
| 1''         | 110.8           | H-1'' | CH              | 4.99             | d, J = 2.5 Hz, 1H                                      | H-2''        | H-2''                                                           | H-5', H-6a', H-6b',      | H-6a', H-6b',                       |

| #   | <sup>13</sup> C | HSQC   | DEPT<br>135     | δ <sup>1</sup> H | Multiplicity, (J, Hz) | COSY   | TOCSY  | NOESY                          | HMBC                    |
|-----|-----------------|--------|-----------------|------------------|-----------------------|--------|--------|--------------------------------|-------------------------|
|     |                 |        |                 |                  |                       |        |        | H-2'', H-4b'', H-5''           | H-2'', H-4b''           |
| 2'' | 78.0            | H-2''  | CH              | 3.88             | d, J = 2.5 Hz, 1H     | H-1''  | H-1''  | H-6a', H-1'', H-4a''           | H-4b'', H-5''           |
| 3'' | 80.6            | H-3''  | C               | -                | -                     | -      | -      | -                              | H-1'', H-4b'',<br>H-5'' |
| 4'' | 75.0            | H-4a'' | CH <sub>2</sub> | 3.95             | d, J = 9.6 Hz, 1H     | H-4b'' | H-4b'' | H-6a', H-1'', H-4b'',<br>H-5'' | H-1''                   |
|     |                 | H-4b'' |                 | 3.75             | d, J = 9.6 Hz, 1H     | H-4a'' | H-4a'' | H-5''                          | H-5''                   |
| 5'' | 65.7            | H-5''  | CH <sub>2</sub> | 3.57             | br.s, 2H              | -      | -      | H-4', H-1'', H-4b''            | H-2'', H-4a''           |



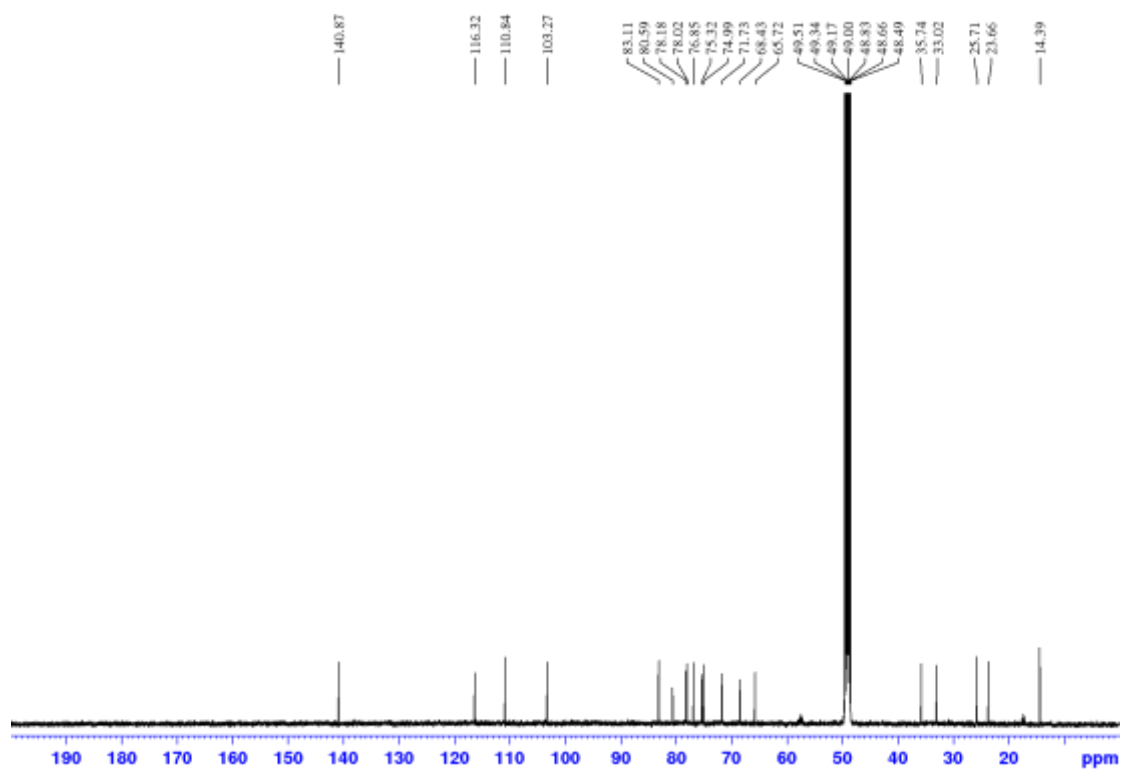

**Figure S3:**  $^{13}\text{C}$ -NMR spectrum of compound **1** ( $\text{CD}_3\text{OD}$ , 125 MHz).

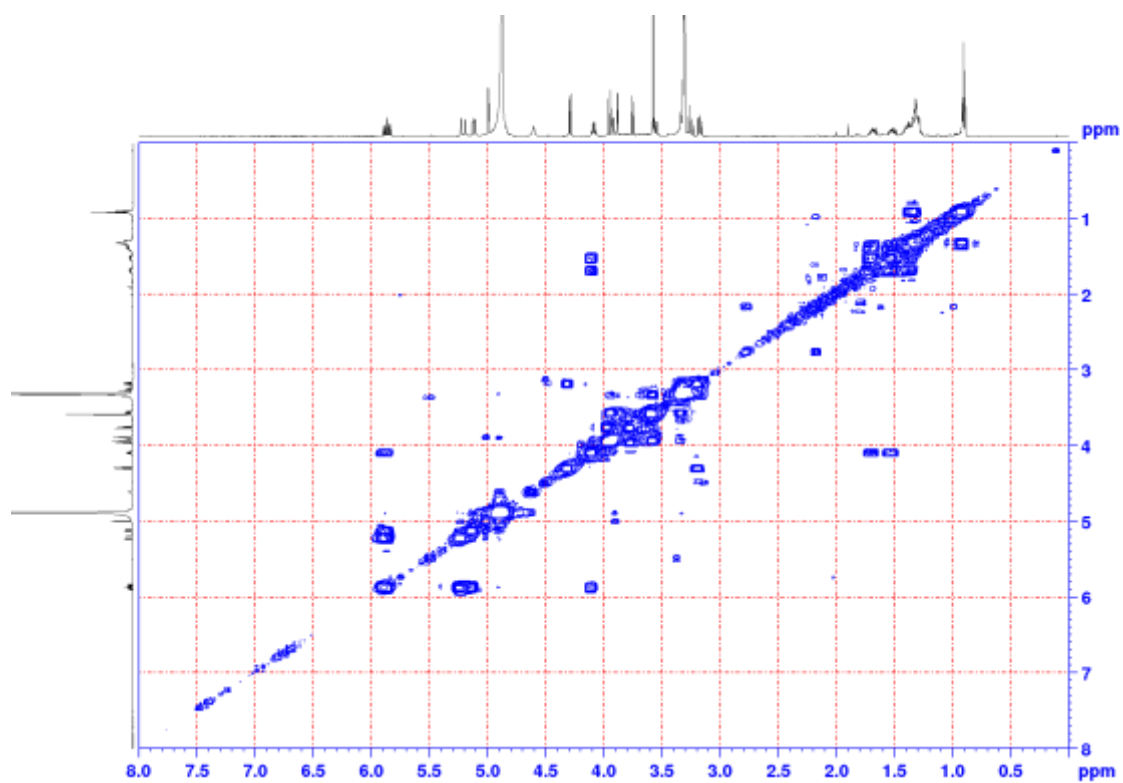

**Figure S4:** COSY spectrum of compound **1** ( $\text{CD}_3\text{OD}$ , 500 MHz).

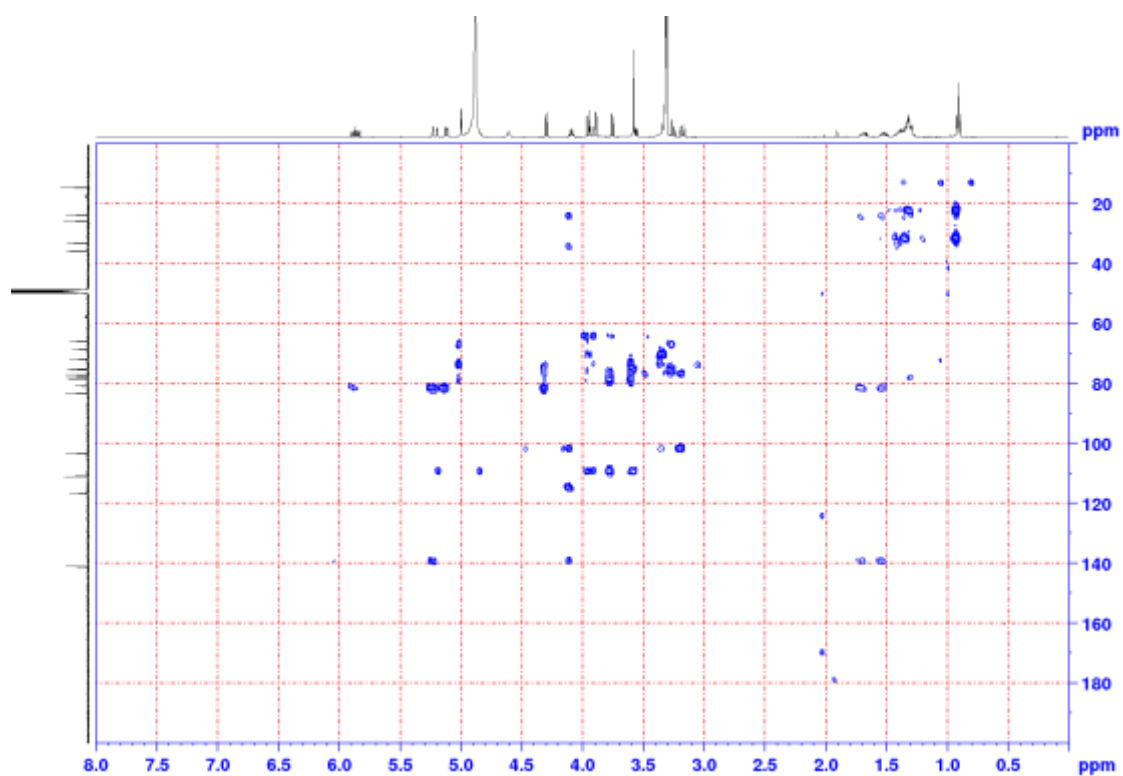

**Figure S5:** HMBC spectrum of compound **1** (CD<sub>3</sub>OD, 500 MHz).

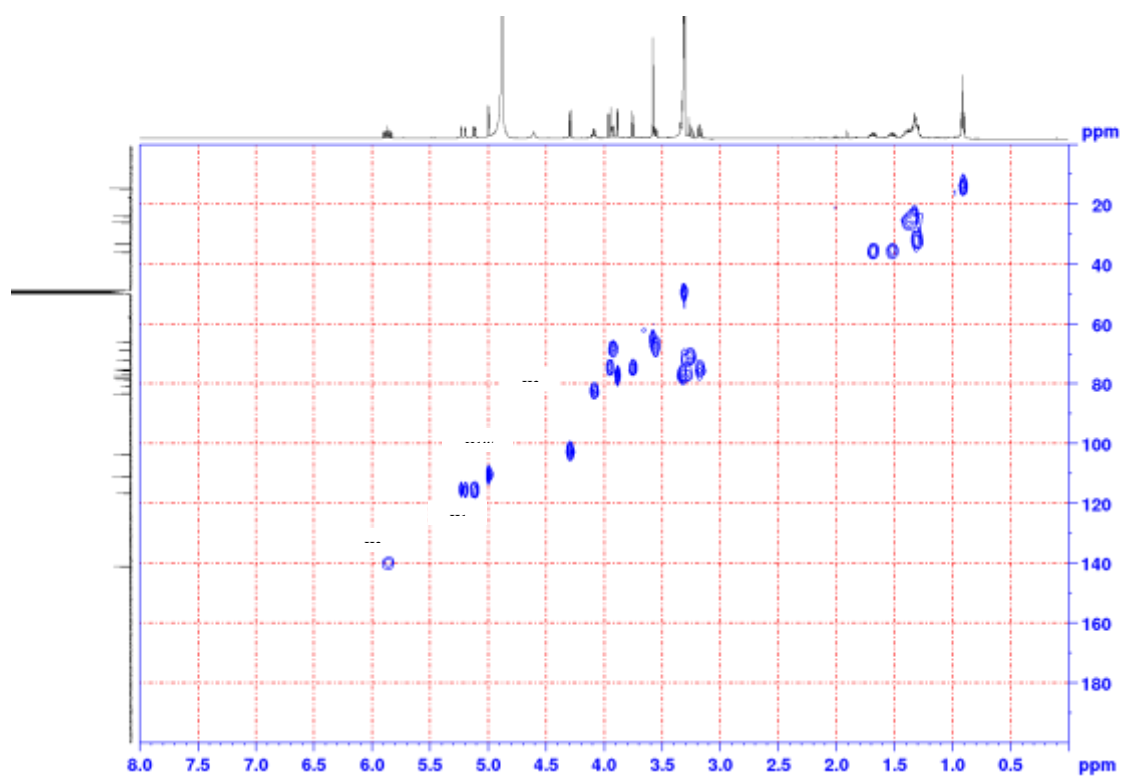

**Figure S6:** HSQC spectrum of compound **1** (CD<sub>3</sub>OD, 500 MHz).

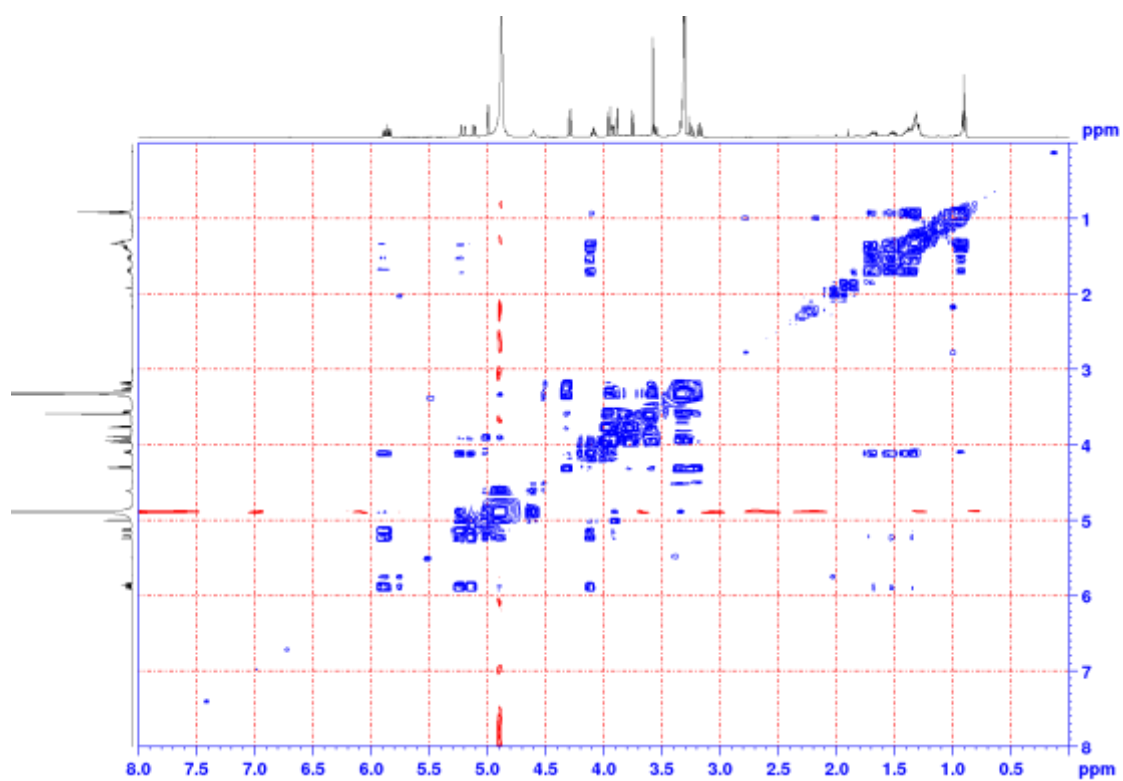

**Figure S7:** TOCSY spectrum of compound **1** (CD<sub>3</sub>OD, 500 MHz).

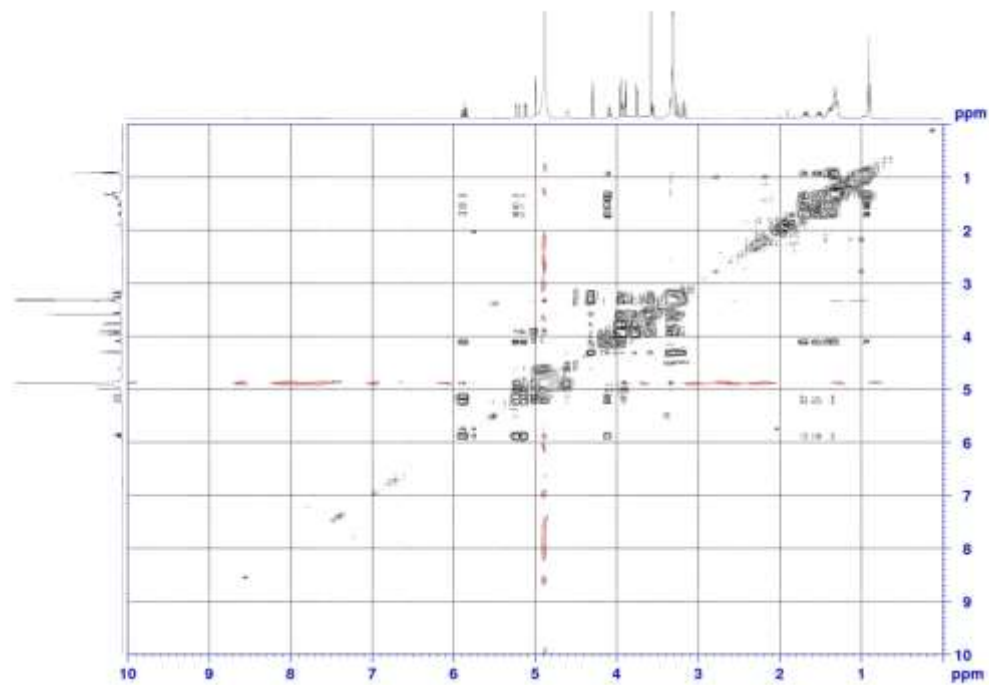

**Figure S8:** NOESY spectrum of compound **1** (CD<sub>3</sub>OD, 500 MHz).



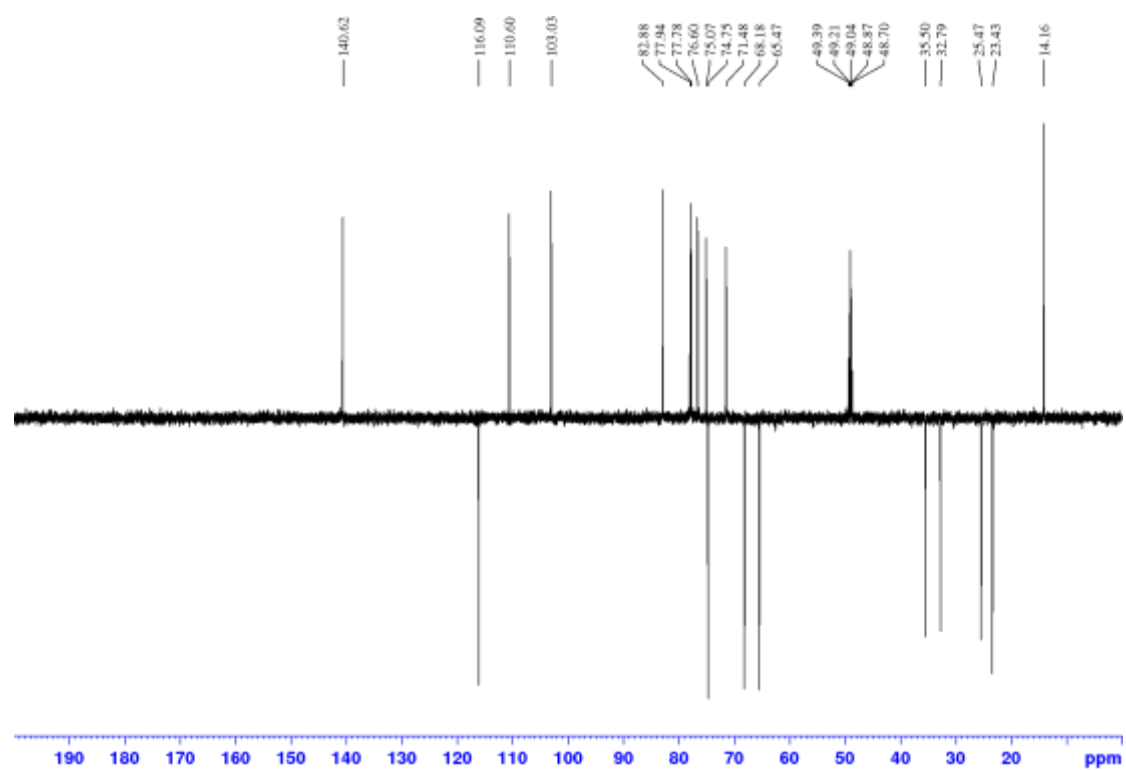

**Figure S9:** DEPT 135 spectrum of compound **1** ( $\text{CD}_3\text{OD}$ , 125 MHz).

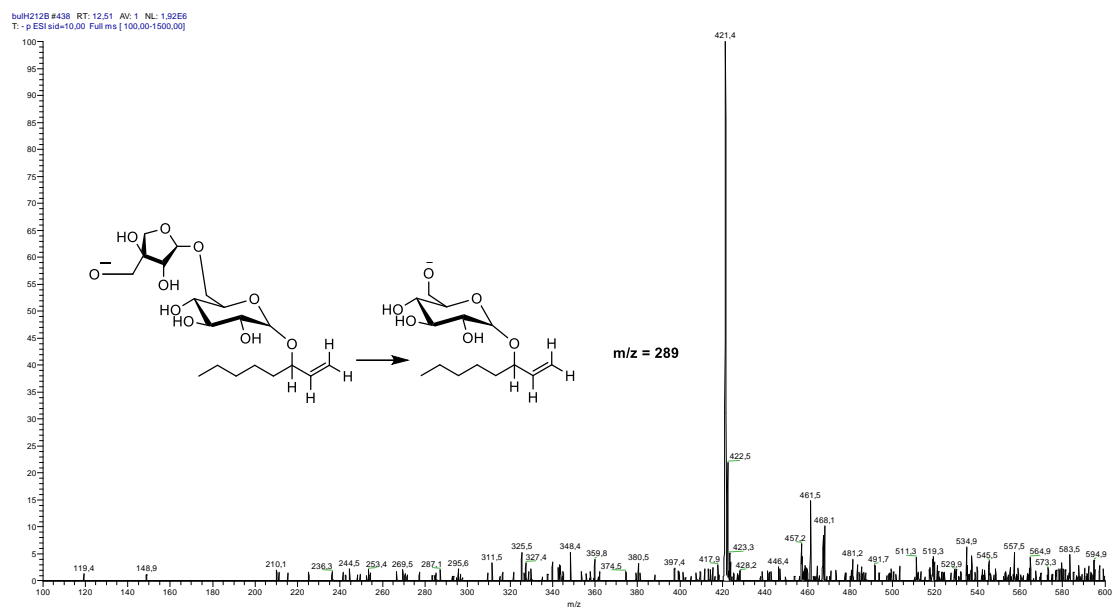

**Figure S10:** ESI-MS spectrum of compound **1**.

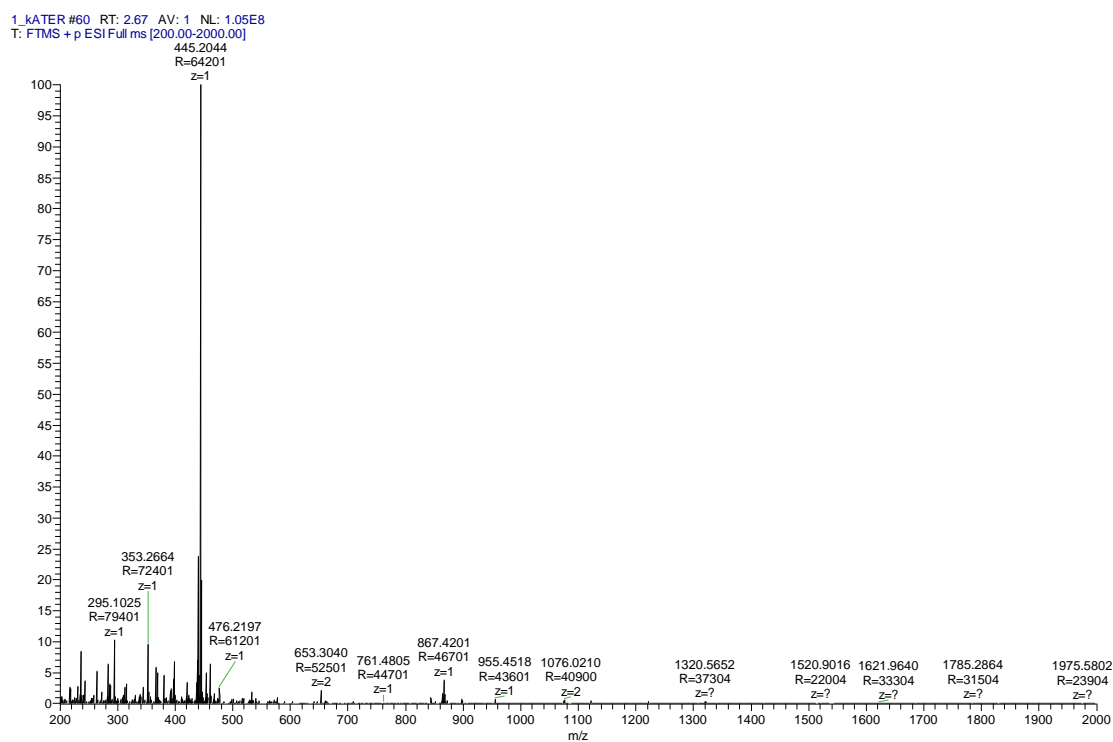

**Figure S11:** HRMS spectrum of compound **1**.

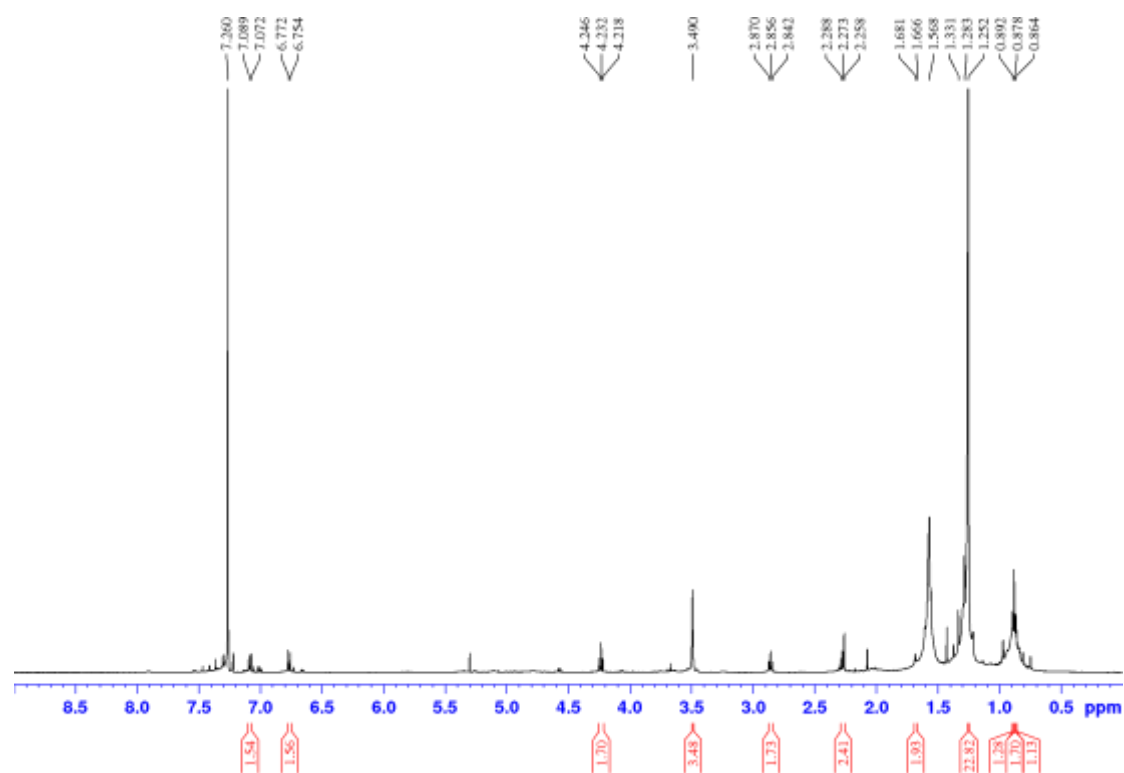

**Figure S12:** <sup>1</sup>H-NMR spectrum of compound **2** (CDCl<sub>3</sub>, 500 MHz).

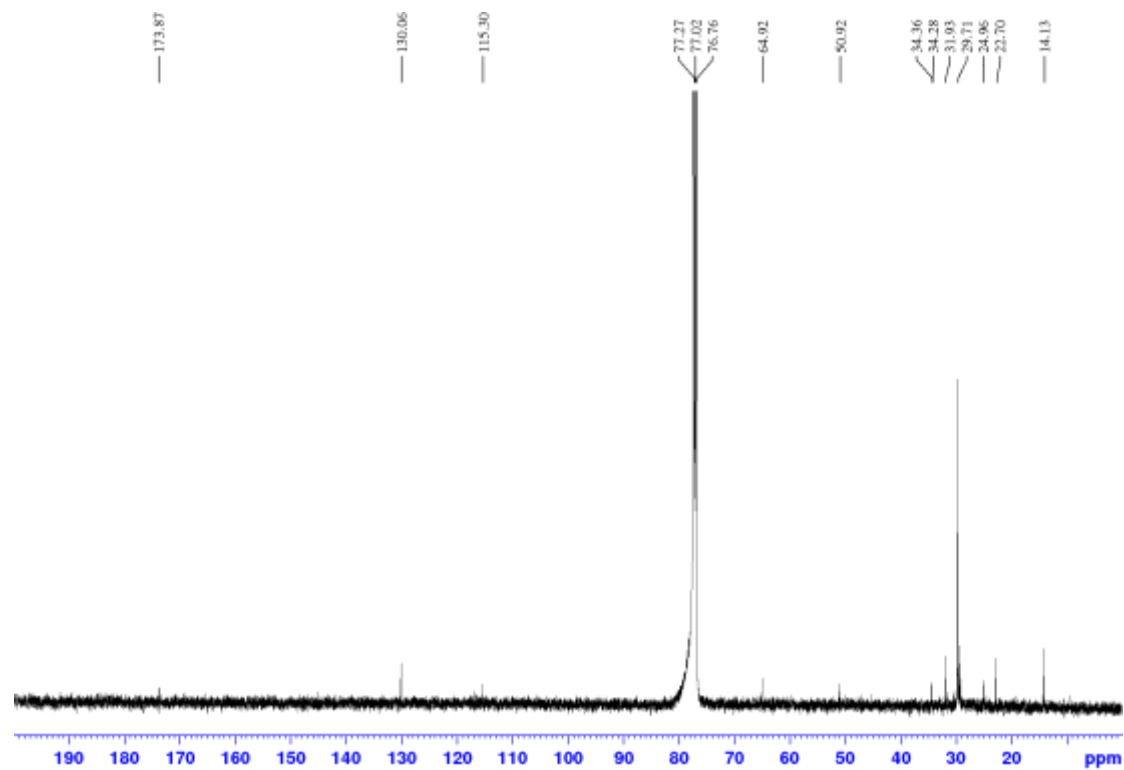

**Figure S13:** <sup>13</sup>C-NMR spectrum of compound **2** (CDCl<sub>3</sub>, 125 MHz).

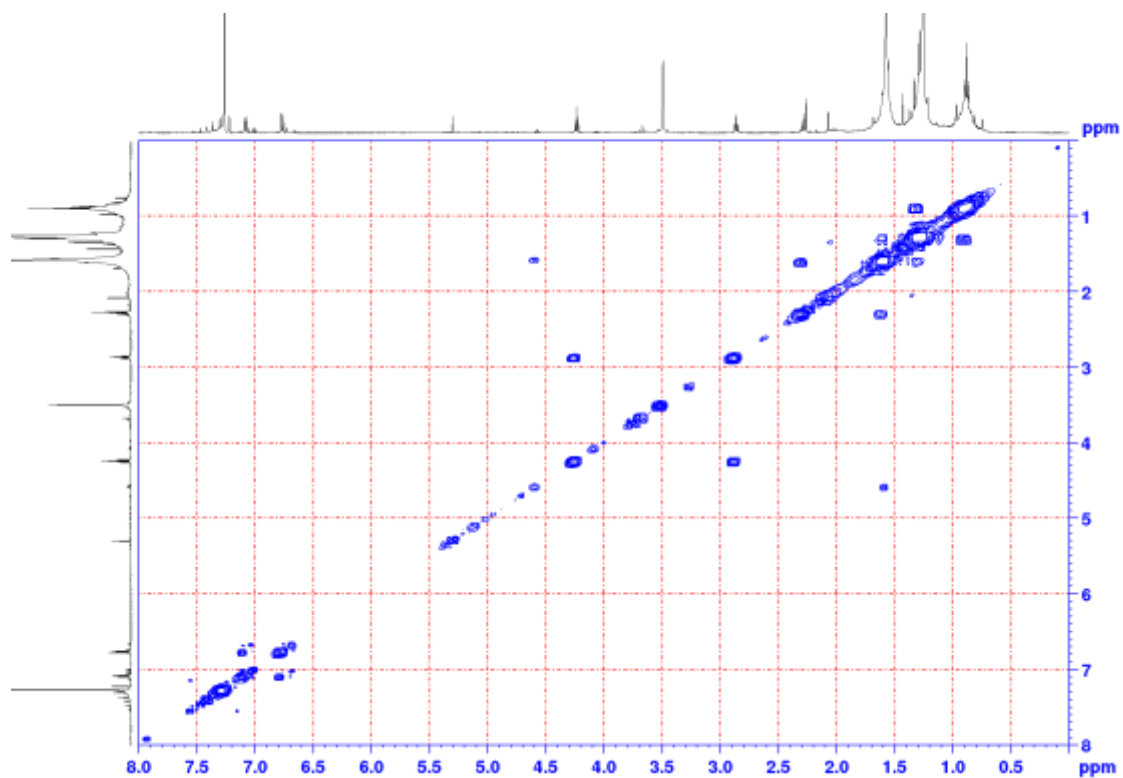

**Figure S14:** COSY spectrum of compound **2** (CDCl<sub>3</sub>, 500 MHz).

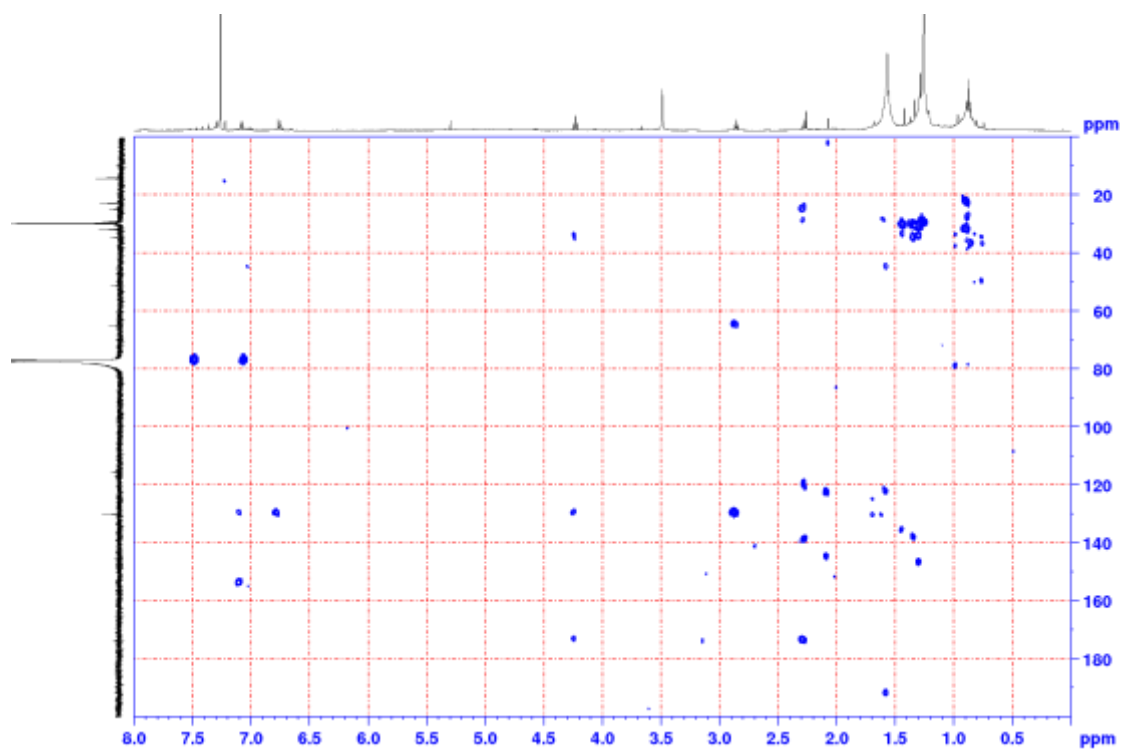

**Figure S15:** HMBC spectrum of compound **2** (CDCl<sub>3</sub>, 500 MHz).

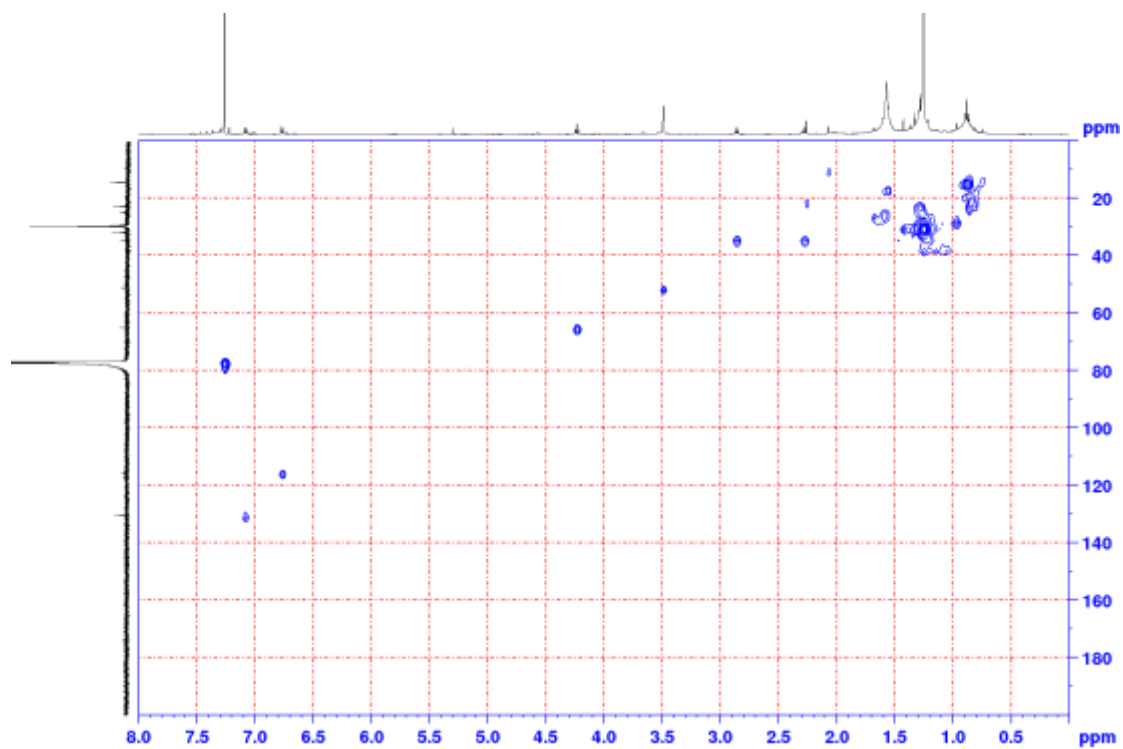

**Figure S16:** HSQC spectrum of compound **2** (CDCl<sub>3</sub>, 500 MHz).

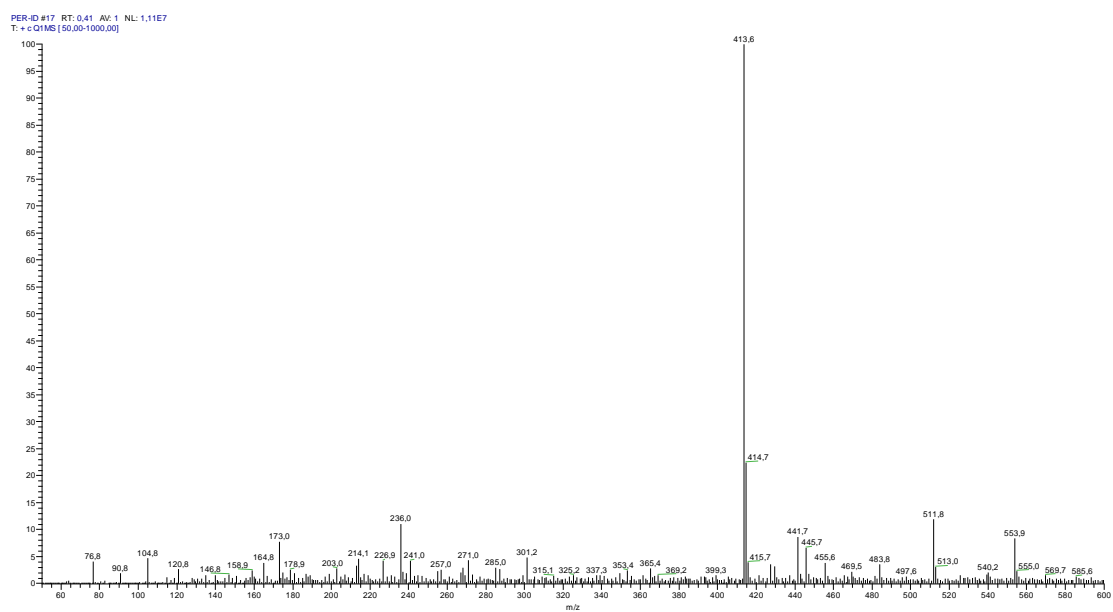

Full mass, (50-1000  $m/z$ ).  $[M+Na]^+$ :  $m/z$  413.6 (100),  $MS^2$  (413.6 $\rightarrow$ 189.0 (100), 165.1 (90), 241.2 (38), 170 (35), 301.1 (30)). Mass range: 80-600  $m/z$ .

**Figure S17:** ESI-MS spectrum of compound **2**.

4\_KATER\_170831112950 #584 RT: 8.99 AV: 1 NL: 6.30E7  
T: FTMS + p ESI Full ms [140.00-2000.00]

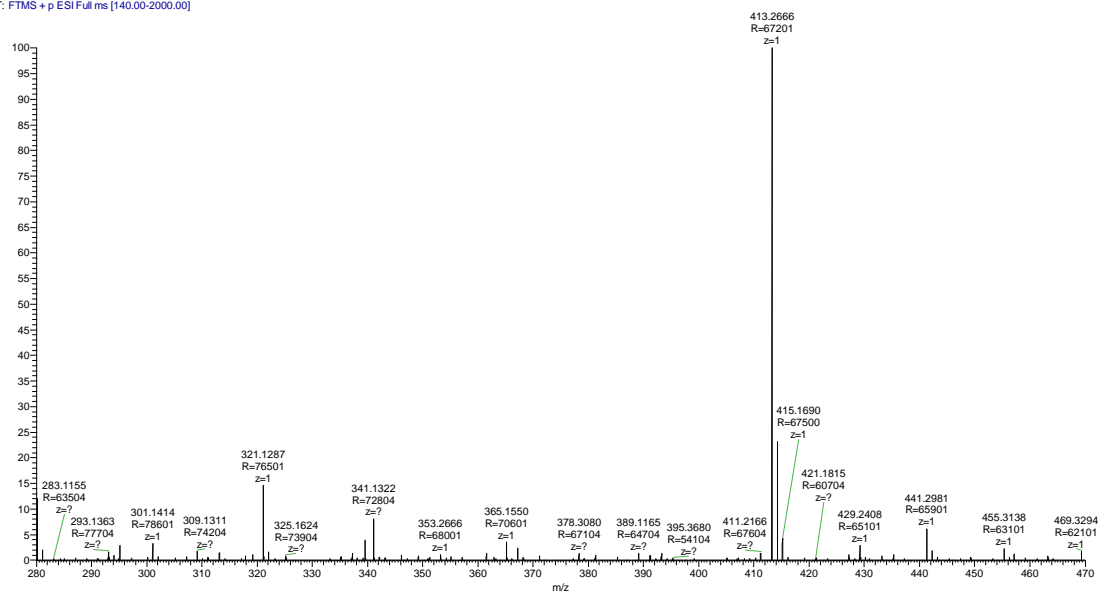

Full mass, (140-2000  $m/z$ ).  $[M+Na]^+$ :  $m/z$  413.2666 (100). Mass range: 280-470  $m/z$ .

**Figure S18:** HRMS spectrum of compound **2**.

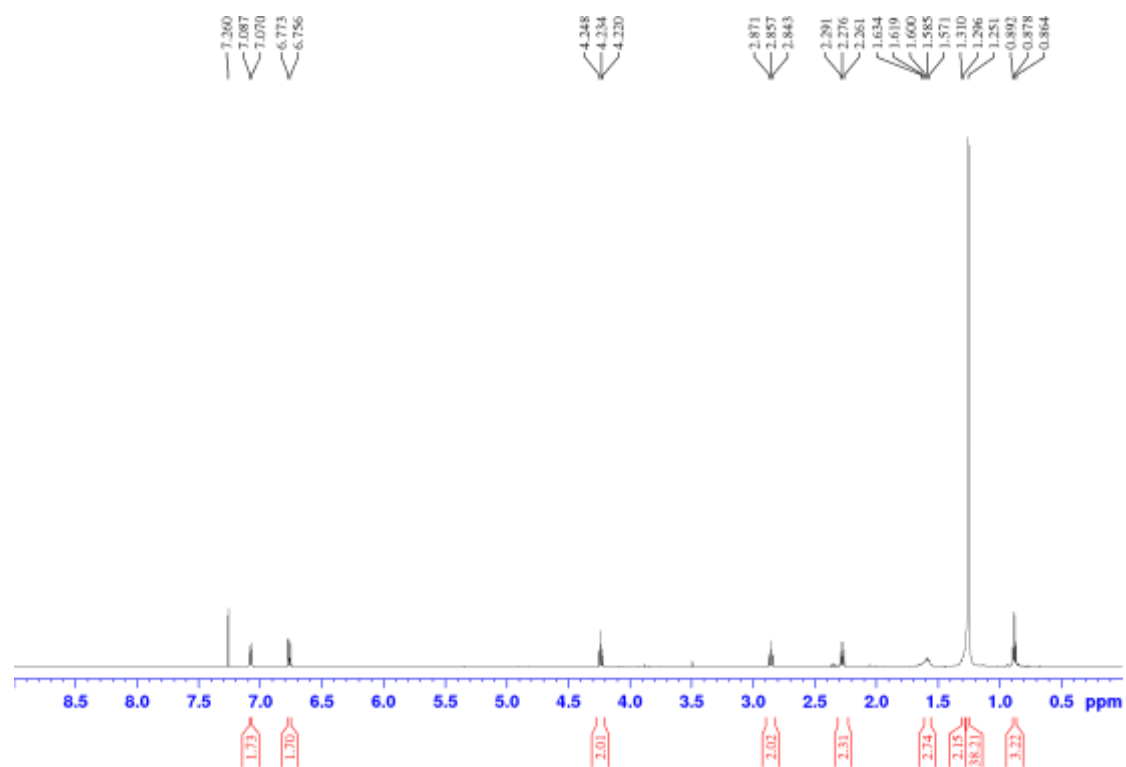

**Figure S19:** <sup>1</sup>H-NMR spectrum of compound **3** (CDCl<sub>3</sub>, 500 MHz).

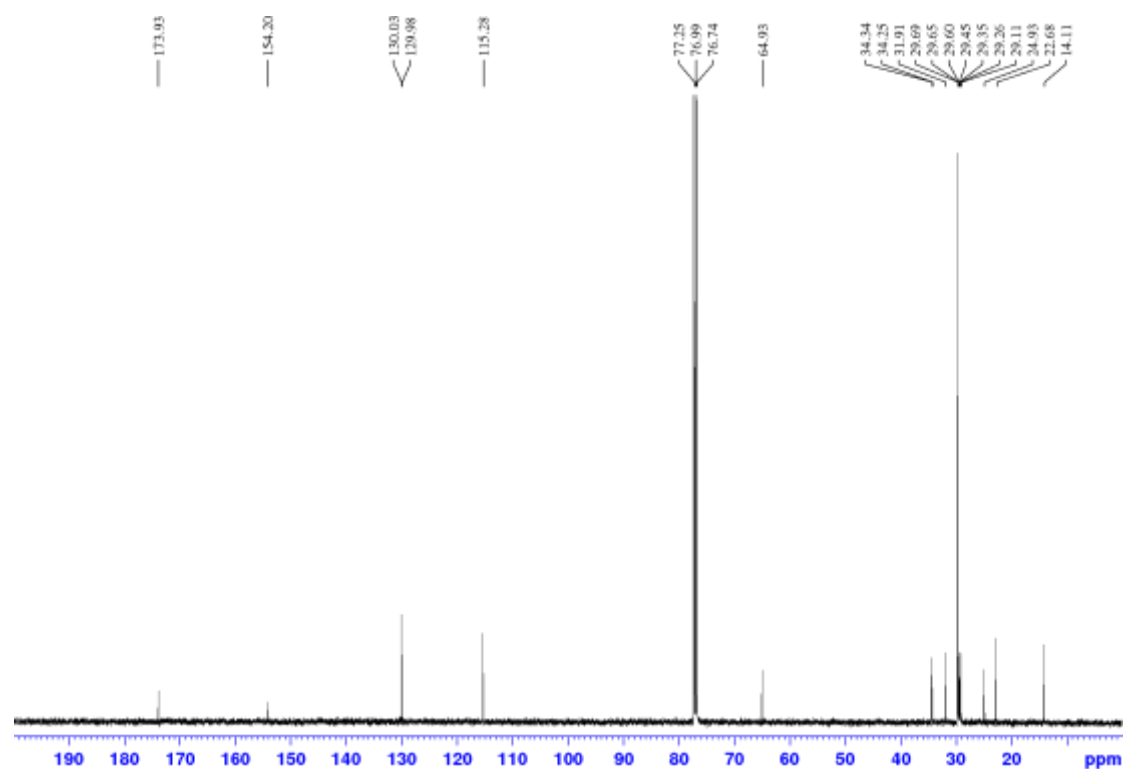

**Figure S20:** <sup>13</sup>C-NMR spectrum of compound **3** (CDCl<sub>3</sub>, 125 MHz).

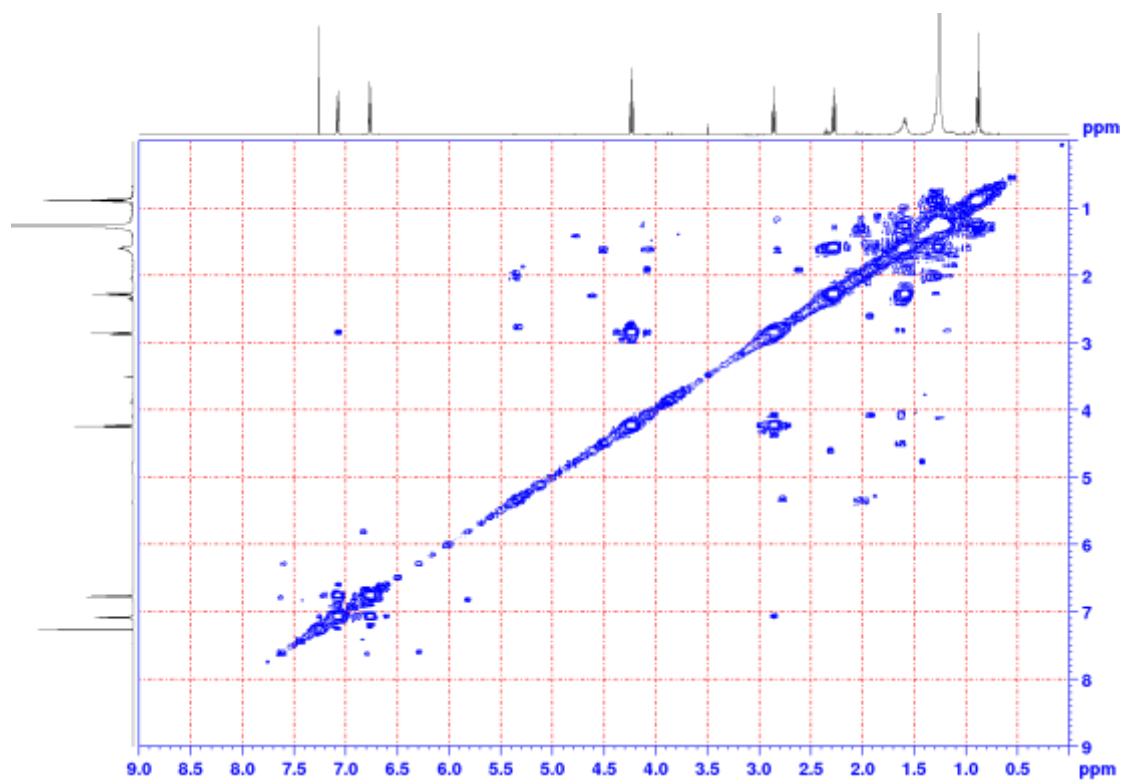

**Figure S21:** COSY spectrum of compound **3** (CDCl<sub>3</sub>, 500 MHz).

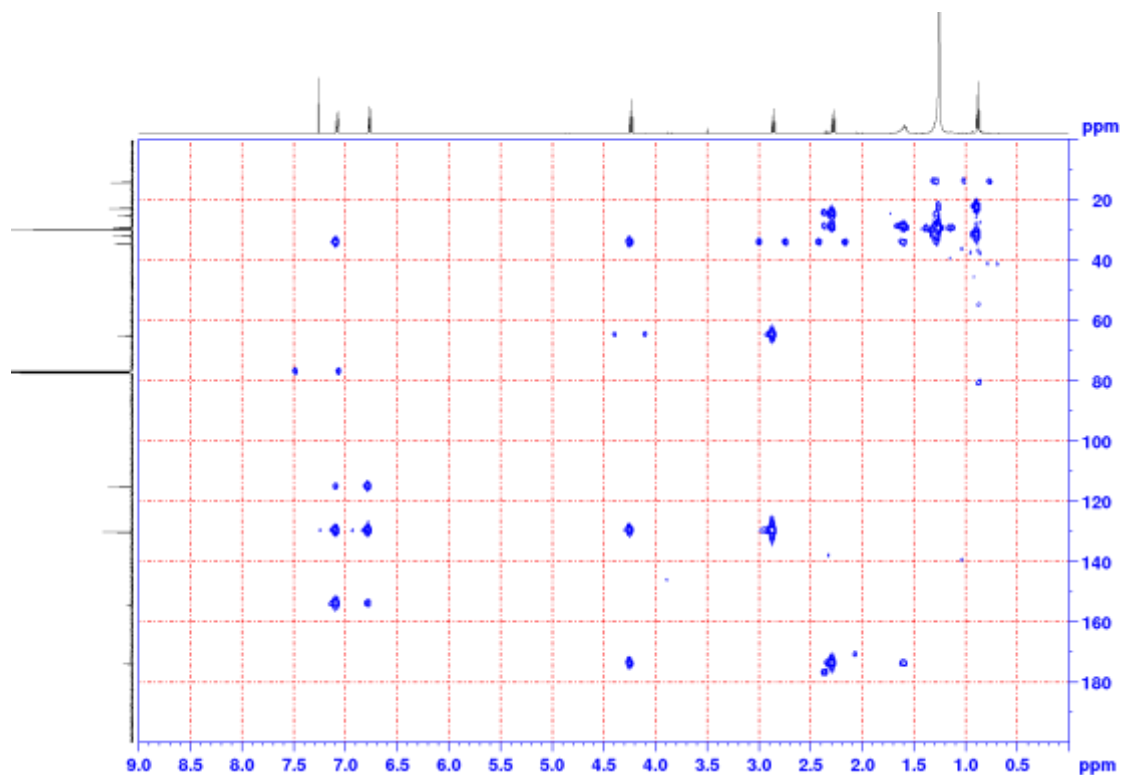

**Figure S22:** HMBC spectrum of compound **3** (CDCl<sub>3</sub>, 500 MHz).



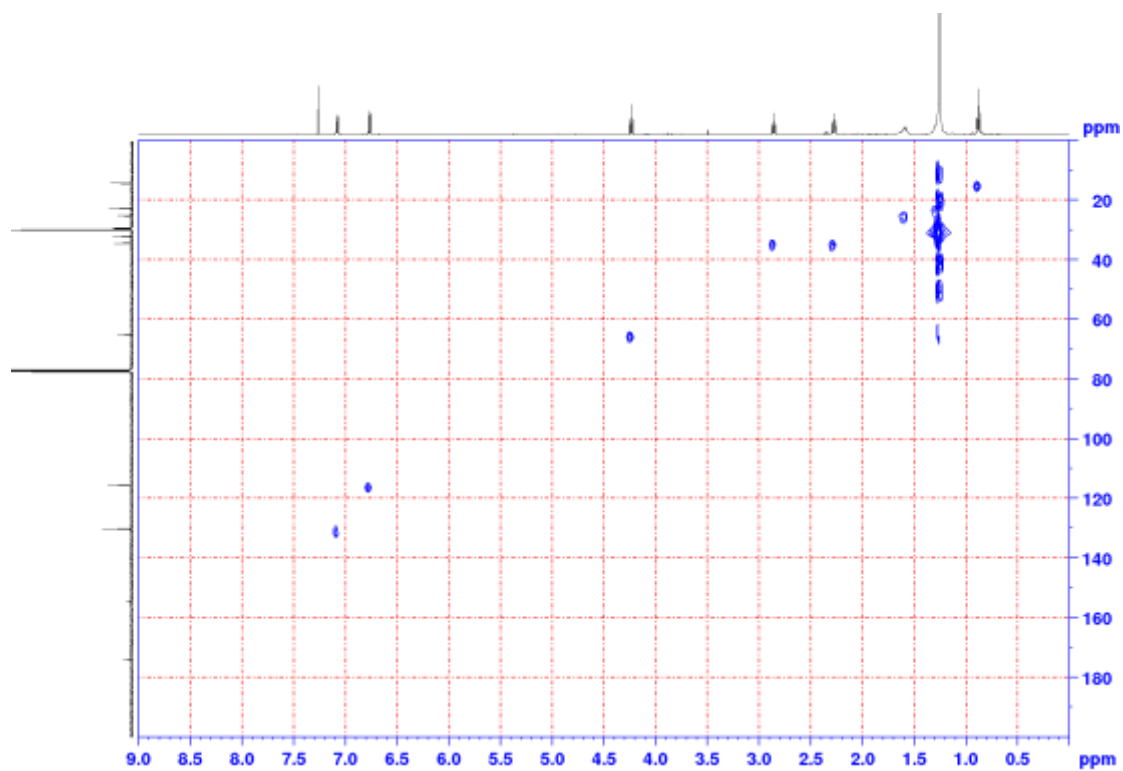

**Figure S23:** HSQC spectrum of compound **3** (CDCl<sub>3</sub>, 500 MHz).

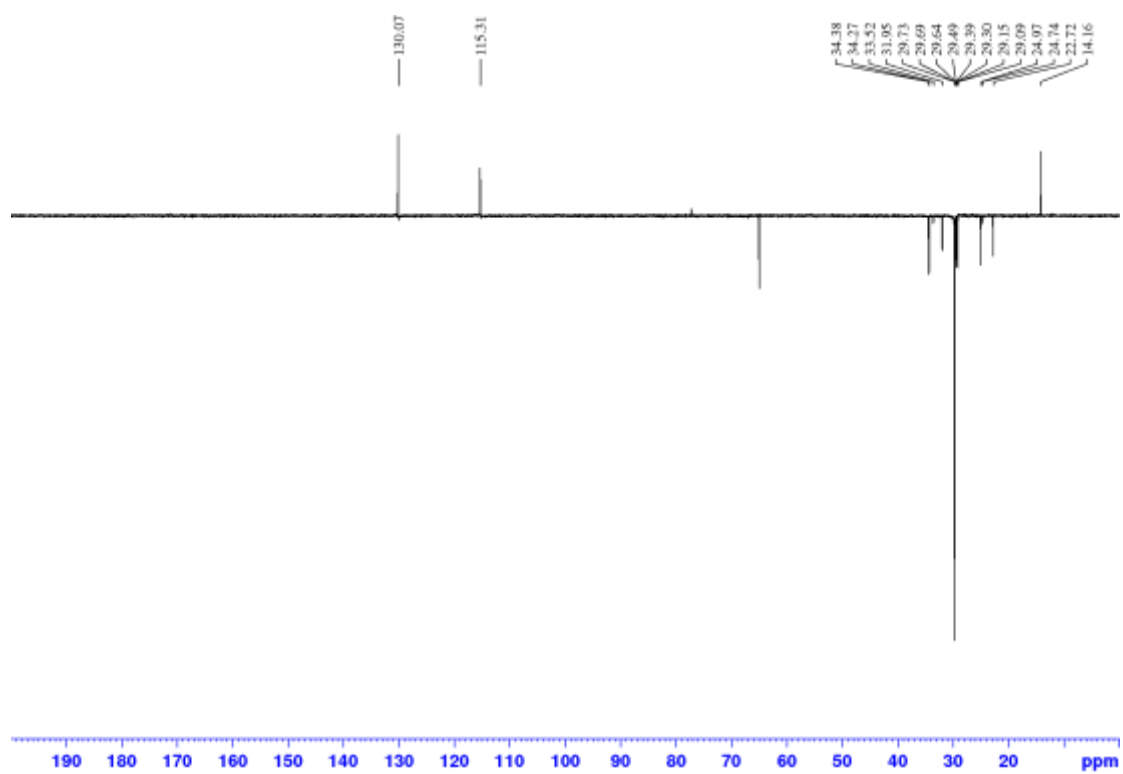

**Figure S24:** DEPT 135 spectrum of compound **3** (CDCl<sub>3</sub>, 125 MHz).

per15 #94 RT: 2.58 AV: 1 NL: 5.11E5  
T: -p ESI sid=5.00 Full ms [165.00-2000.00]

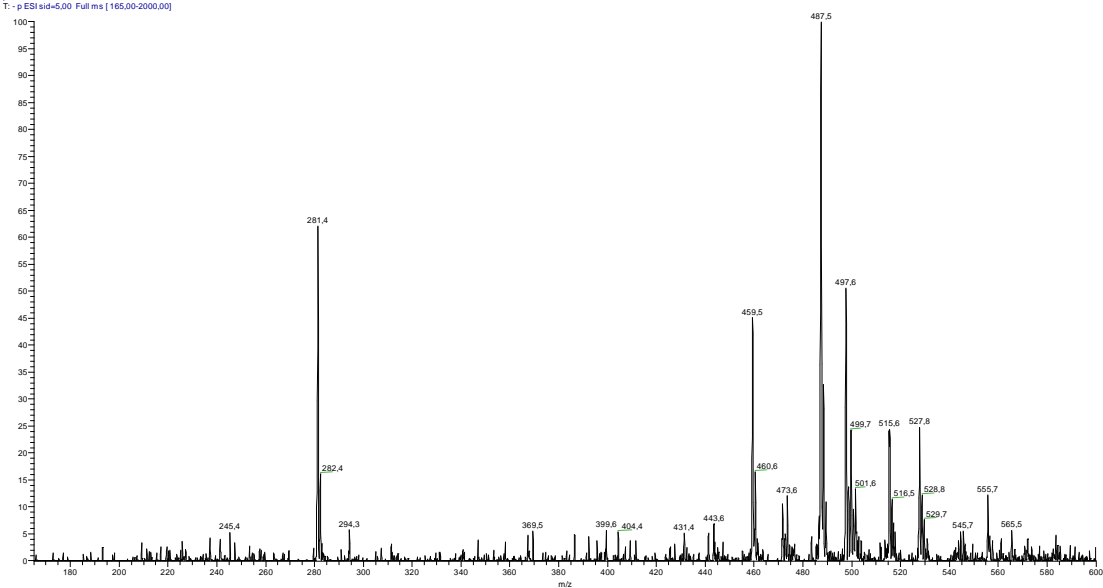

Full mass, (165-2000  $m/z$ ).  $[M-H]^-$ :  $m/z$  487.5 (100), 281.4 (65),  $MS^2$  (487.5 $\rightarrow$ 485.8 (100), 367.6 (60), 281.4 (50)). Mass range: 165-600  $m/z$ .

**Figure S25:** ESI-MS spectrum of compound **3**.

**Table S2:** NMR spectroscopic data of metabolite **4** (brassicasterol), (CDCl<sub>3</sub>, 500 MHz).

| #  | <sup>13</sup> C | HSQC  | DEPT-135        | $\delta$ <sup>1</sup> H | Multiplicity, ( <i>J</i> Hz)                                        | COSY             | HMBC                         |
|----|-----------------|-------|-----------------|-------------------------|---------------------------------------------------------------------|------------------|------------------------------|
| 1  | 37.2            | H-1a  | CH <sub>2</sub> | 1.86                    | m, 1H                                                               | H-1b             | H-19                         |
|    |                 | H-1b  |                 | 1.09                    | m, 1H                                                               | H-1a             |                              |
| 2  | 31.9            | H-2a  | CH <sub>2</sub> | 1.84                    | m, 1H                                                               | H-1b, H-2b       | H-4a                         |
|    |                 | H-2b  |                 | 1.52                    | m, 1H                                                               | H-2a             |                              |
| 3  | 71.8            | H-3   | CH              | 3.51                    | m, 1H                                                               | H-2b, H-4a, H-4b | H-2a, H-2b, H-4a             |
| 4  | 42.3            | H-4a  | CH <sub>2</sub> | 2.28                    | dd, <i>J</i> <sub>1</sub> = 5.3, <i>J</i> <sub>2</sub> = 2.2 Hz, 1H | H-3              | H-2a, H-6                    |
|    |                 | H-4b  |                 | 2.24                    | dd, <i>J</i> <sub>1</sub> = 5.0, <i>J</i> <sub>2</sub> = 2.1 Hz, 1H | H-3              |                              |
| 5  | 140.7           | -     | C               | -                       | -                                                                   | -                | H-2a, H-2b, H-4a, H-4b, H-19 |
| 6  | 121.7           | H-6   | CH              | 5.35                    | br.d, <i>J</i> = 5.3 Hz, 1H                                         | H-4b, H-7a, H-7b | H-4a, H-4b, H-7a, H-7b       |
| 7  | 31.9            | H-7a  | CH <sub>2</sub> | 1.97                    | m, 1H                                                               | H-6, H-7b        | H-6, H-8                     |
|    |                 | H-7b  |                 | 1.53                    | m, 1H                                                               | H-7a             |                              |
| 8  | 31.6            | H-8   | CH              | 1.48                    | m, 1H                                                               | H-7a             | H-6, H-7                     |
| 9  | 50.1            | H-9   | CH              | 0.93                    | m, 1H                                                               | H-8              | H-19                         |
| 10 | 36.4            | -     | C               | -                       | -                                                                   | -                | H-4a, H-6, H-9, H-19         |
| 11 | 21.2            | H-11  | CH <sub>2</sub> | 1.50                    | m, 2H                                                               | H-9, H-12        | H-9                          |
| 12 | 40.6            | H-12a | CH <sub>2</sub> | 2.00                    | m, 1H                                                               | H-11, H-12b      |                              |

| #  | <sup>13</sup> C | HSQC  | DEPT-135        | $\delta$ <sup>1</sup> H | Multiplicity, ( <i>J</i> Hz)                                                                      | COSY               | HMBC              |
|----|-----------------|-------|-----------------|-------------------------|---------------------------------------------------------------------------------------------------|--------------------|-------------------|
|    |                 | H-12b |                 | 1.18                    | m, 1H                                                                                             | H-12a              | H-18, H-19        |
| 13 | 42.2            | -     | C               | -                       | -                                                                                                 | -                  | H-18              |
| 14 | 56.7            | H-14  | CH              | 1.00                    | m, 1H                                                                                             | H-8, H-15          | H-12, H-18        |
| 15 | 24.3            | H-15a | CH <sub>2</sub> | 1.56                    | m, 1H                                                                                             | H-14, H-16a        | -                 |
|    |                 | H-15b |                 | 1.04                    | m, 1H                                                                                             | H-16a              |                   |
| 16 | 28.2            | H-16a | CH <sub>2</sub> | 1.83                    | m, 1H                                                                                             | H-15a, H-16b, H-17 | -                 |
|    |                 | H-16b |                 | 1.25                    | m, 1H                                                                                             | H-16a              |                   |
| 17 | 56.0            | H-17  | CH              | 1.10                    | m, 1H                                                                                             | H-16a              | H-15b, H-18, H-21 |
| 18 | 11.9            | H-18  | CH <sub>3</sub> | 0.67                    | s, 3H                                                                                             | -                  | H-17              |
| 19 | 21.1            | H-19  | CH <sub>3</sub> | 1.01                    | s, 3H                                                                                             | -                  | -                 |
| 20 | 39.8            | H-20  | CH              | 2.03                    | m, 1H                                                                                             | -                  | H-17, H-18        |
| 21 | 18.7            | H-21  | CH <sub>3</sub> | 0.91                    | d, <i>J</i> = 6.5, 3H                                                                             | -                  | H-17              |
| 22 | 129.3           | H-22  | CH              | 5.01                    | dd, <i>J</i> <sub>1</sub> = 15.7, <i>J</i> <sub>2</sub> = 8.6 Hz, 1H                              | H-23               | H-23              |
| 23 | 138.3           | H-23  | CH              | 5.15                    | dd, <i>J</i> <sub>1</sub> = 15.7, <i>J</i> <sub>2</sub> = 8.6 Hz, 1H                              | H-22, H-20         | H-22              |
| 24 | 39.8            | H-24  | CH              | 1.99                    | ddq, <i>J</i> <sub>1</sub> = 7.8, <i>J</i> <sub>2</sub> = 5.1, <i>J</i> <sub>3</sub> = 2.2 Hz, 1H | H-23               | H-28              |
| 25 | 33.9            | H-25  | CH              | 1.31                    | m, 1H                                                                                             | -                  | H-26, H-27        |
| 26 | 21.1            | H-26  | CH <sub>3</sub> | 0.82                    | d, <i>J</i> = 7.0 Hz, 3H                                                                          | -                  | H-27              |

| #  | <sup>13</sup> C | HSQC | DEPT-135        | $\delta$ <sup>1</sup> H | Multiplicity, ( <i>J</i> Hz) | COSY | HMBC       |
|----|-----------------|------|-----------------|-------------------------|------------------------------|------|------------|
| 27 | 18.8            | H-27 | CH <sub>3</sub> | 0.79                    | d, <i>J</i> = 7.0 Hz, 3H     | -    | H-25, H-26 |
| 28 | 11.8            | H-28 | CH <sub>3</sub> | 0.68                    | d, <i>J</i> = 8.9 Hz, 3H     | -    | H-25       |

**Table S3:** NMR spectroscopic data of metabolite **5** (stigmasterol), (CDCl<sub>3</sub>, 500 MHz).

| # | <sup>13</sup> C | HSQC | DEPT-135        | $\delta$ <sup>1</sup> H | Multiplicity, ( <i>J</i> , Hz)                                                                     | COSY            | NOESY            | HMBC                        |
|---|-----------------|------|-----------------|-------------------------|----------------------------------------------------------------------------------------------------|-----------------|------------------|-----------------------------|
| 1 | 37.2            | H-1a | CH <sub>2</sub> | 1.07                    | m, 1H                                                                                              | H-1b, H-2a      | H-1b, H-2a       | H-19                        |
|   |                 | H-1b |                 | 1.83                    | m, 1H                                                                                              | H-1a            | H-1a             |                             |
| 2 | 31.6            | H-2a | CH <sub>2</sub> | 1.84                    | t, <i>J</i> = 4.1 Hz, 1H                                                                           | H-1a, H-3       | H-1a             | H-3, H-4a, H-4b             |
|   |                 | H-2b |                 | 1.97                    | m, 1H                                                                                              | -               | -                |                             |
| 3 | 71.8            | H-3  | CH              | 3.52                    | tdd, <i>J</i> <sub>1</sub> = 11.1, <i>J</i> <sub>2</sub> = 5.2, <i>J</i> <sub>3</sub> = 4.6 Hz, 1H | H2a, H-4a       | H-2a, H-4a, H-4b | H-4a, H-4b, H-1b            |
| 4 | 42.3            | H-4a | CH <sub>2</sub> | 2.24                    | dd, <i>J</i> <sub>1</sub> = 13.3, <i>J</i> <sub>2</sub> = 2.3 Hz, 1H                               | H-3             | -                | H-6                         |
|   |                 | H-4b |                 | 2.28                    | dd, <i>J</i> <sub>1</sub> = 13.3, <i>J</i> <sub>2</sub> = 2.3 Hz, 1H                               | H-3             | H-6              |                             |
| 5 | 140.7           | -    | C               | -                       | -                                                                                                  | -               | -                | H-4a, H-4b, H-7a, H-8, H-19 |
| 6 | 121.7           | H-6  | CH              | 5.34                    | m, 1H                                                                                              | H4a, H7b        | H-4b, H-7b, H-8  | H-4a, H-4b, H-8             |
| 7 | 31.6            | H-7a | CH <sub>2</sub> | 1.52                    | m, 1H                                                                                              | H-8             | H-8              | H-4b                        |
|   |                 | H-7b |                 | 1.97                    | m, 1H                                                                                              | H-8             | H-14, H-12b, H-8 |                             |
| 8 | 31.8            | H-8  | CH              | 1.52-1.50               | m, 1H                                                                                              | H-7a, H-7b, H-9 | H-7a, H-7b       | H-9                         |

| #  | <sup>13</sup> C | HSQC  | DEPT-135        | δ <sup>1</sup> H | Multiplicity, (J, Hz)                                                      | COSY        | NOESY                   | HMBC                          |
|----|-----------------|-------|-----------------|------------------|----------------------------------------------------------------------------|-------------|-------------------------|-------------------------------|
| 9  | 50.1            | H-9   | CH              | 0.94             | m 1H                                                                       | H-8         | H-8                     | H-12a, H-14                   |
| 10 | 36.5            | -     | C               | -                | -                                                                          | -           | -                       | H-2, H-4, H-6, H-19           |
| 11 | 21.1            | H-11  | CH <sub>2</sub> | 1.49-1.51        | m, 2H                                                                      | H-9, H-12a  | H-12a                   | H-9                           |
| 12 | 39.7            | H-12a | CH <sub>2</sub> | 1.99-2.01        | m, 1H                                                                      | H-11, H-12b | H-12b, H-18             | H-14, H-18                    |
|    |                 | H-12b |                 | 1.17-1.19        | m, 1H                                                                      | H-11, H-12a | H-12a                   |                               |
| 13 | 42.1            | -     | C               | -                | -                                                                          | -           | -                       | H-18                          |
| 14 | 56.8            | H-14  | CH              | 1.01             | br. d, J = 2.0 Hz, 1H                                                      | H-8, H-15a  | H-15                    | H-12a, H-18                   |
| 15 | 24.3            | H-15a | CH <sub>2</sub> | 1.55             | m, 1H                                                                      | H-14        | H-14                    | H-16b                         |
|    |                 | H-15b |                 | 1.06             | m, 1H                                                                      | -           | H-14                    |                               |
| 16 | 28.9            | H-16a | CH <sub>2</sub> | 1.24-1.28        | m, 1H                                                                      | H-16b, H-17 | H-16b                   | H-17                          |
|    |                 | H-16b |                 | 1.69             | ddt, J <sub>1</sub> = 13.9, J <sub>2</sub> = 5.7, J <sub>3</sub> = 3.5, 1H | H-16a       | H-16a                   |                               |
| 17 | 55.9            | H-17  | CH              | 1.13-1.15        | m, 1H                                                                      | H-20        | H-20                    | H-12, H-18, H-16, H-20, H-21  |
| 18 | 12.0            | H-18  | CH <sub>3</sub> | 0.69             | s, 3H                                                                      | -           | H-11, H-12, H-21        | H-12a, H-14                   |
| 19 | 19.4            | H-19  | CH <sub>3</sub> | 1.00             | s, 3H                                                                      | -           | -                       | H-20                          |
| 20 | 40.5            | H-20  | CH              | 1.13-1.15        | m, 1H                                                                      | H-21        | H-17                    | H-21, H-22                    |
| 21 | 21.1            | H-21  | CH <sub>3</sub> | 1.02             | d, J = 6.7 Hz, 3H                                                          | -           | H-24                    | H-22                          |
| 22 | 138.3           | H-22  | CH              | 5.14             | dd, J <sub>1</sub> = 15.5, J <sub>2</sub> = 8.7 Hz, 1H                     | H-23        | H-21, H-24, H-28b, H-29 | H-20, H-21, H-23              |
| 23 | 129.2           | H-23  | CH              | 5.01             | dd, J <sub>1</sub> = 15.5, J <sub>2</sub> = 8.7 Hz, 1H                     | H-22, H-24  | H-21, H-24, H-28b, H-29 | H-22, H-24, H-28a, H-28b H-26 |

| #  | <sup>13</sup> C | HSQC  | DEPT-135        | δ <sup>1</sup> H | Multiplicity, (J, Hz) | COSY              | NOESY            | HMBC                   |
|----|-----------------|-------|-----------------|------------------|-----------------------|-------------------|------------------|------------------------|
|    |                 |       |                 |                  |                       |                   |                  | H-27                   |
| 24 | 51.2            | H-24  | CH              | 1.52             | m, 1H                 | H-23, H-25, H-28  | H-29, H-21 H-25  | H-22, H-23, H-26, H-27 |
| 25 | 31.9            | H-25  | CH              | 1.44             | m, 1H                 | H-24              | -                | H-26, H-28a, H-24      |
| 26 | 21.2            | H-26  | CH <sub>3</sub> | 0.84             | d, J = 6.4 Hz, 3H     | -                 | H-24             | H-24, H-27             |
| 27 | 19.0            | H-27  | CH <sub>3</sub> | 0.79             | d, J = 6.4 Hz, 3H     | -                 | H-24, H-28, H-29 | H-24, H-26             |
| 28 | 25.4            | H-28a | CH <sub>2</sub> | 1.41             | m, 1H                 | H-24, H-28b, H-29 | H-28b            | H-24, H-29             |
|    |                 | H-28b |                 | 1.16             | m, 1H                 | H-28a, H-29       | H-27             |                        |
| 29 | 12.2            | H-29  | CH <sub>3</sub> | 0.81             | t, J = 7.4 Hz, 3H     | H-28a, H-28b      | H-24             | H-28b                  |

**Table S4:** NMR spectroscopic data of metabolite **6** (verbascoside), (CD<sub>3</sub>OD, 500 MHz).

| #                      | <sup>13</sup> C | HSQC | DEPT-135 | δ <sup>1</sup> H | Multiplicity, (J, Hz) | COSY | NOESY | HMBC                 |
|------------------------|-----------------|------|----------|------------------|-----------------------|------|-------|----------------------|
| <b>Phenethyl group</b> |                 |      |          |                  |                       |      |       |                      |
| 1                      | 131.4           | -    | C        | -                | -                     | -    | -     | H-5, H-7, H-8a, H-8b |
| 2                      | 117.1           | H-2  | CH       | 6.69             | d, J = 2.0 Hz, 1H     | H-6  | H-7   | H-6, H-7             |
| 3                      | 146.0           |      | C        | -                | -                     | -    | -     | H-5                  |
| 4                      | 144.5           |      | C        | -                | -                     | -    | -     | H-2, H-6             |
| 5                      | 117.2           | H-5  | CH       | 6.67             | d, J = 8.0 Hz, 1H     | H-6  | -     | -                    |

| #              | <sup>13</sup> C | HSQC  | DEPT-135        | δ <sup>1</sup> H | Multiplicity, (J, Hz)                                                         | COSY         | NOESY                | HMBC                |
|----------------|-----------------|-------|-----------------|------------------|-------------------------------------------------------------------------------|--------------|----------------------|---------------------|
| 6              | 121.3           | H-6   | CH              | 6.56             | dd, J <sub>1</sub> = 8.0, J <sub>2</sub> = 2.0 Hz, 1H                         | H-2, H-5     | -                    | H-2, H-5, H-7       |
| 7              | 36.4            | H-7   | CH <sub>2</sub> | 2.79             | ddt, J <sub>1</sub> = 3.5, J <sub>2</sub> = 7.3, J <sub>3</sub> = 14.0 Hz, 2H | H-8a, H-8b   | H-2, H-6, H-8a, H-8b | H-8, H-2, H-6       |
| 8              | 71.9            | H-8a  | CH <sub>2</sub> | 4.04             | m, 1H                                                                         | H-7, H-8b    | H-8                  | H-7, H-1''          |
|                |                 | H-8b  |                 | 3.73             | m, 1H                                                                         | H-7, H-8a    | H-7                  | H-7, H-1''          |
| Caffeoyl group |                 |       |                 |                  |                                                                               |              |                      |                     |
| 1'             | 127.6           | -     | C               | -                | -                                                                             | -            | -                    | H-5', H-7', H-8'    |
| 2'             | 114.6           | H-2'  | CH              | 7.05             | d, J = 2.0 Hz, 1H                                                             | H-6'         | -                    | H-6', H-7'          |
| 3'             | 146.7           | -     | C               | -                | -                                                                             | -            | -                    | H-2', H-5'          |
| 4'             | 149.7           | -     | C               | -                | -                                                                             | -            | -                    | H-2', H-5', H-6'    |
| 5'             | 116.5           | H-5'  | CH              | 6.78             | d, J = 8.1 Hz, 1H                                                             | H-6'         | -                    | H-6', H-7'          |
| 6'             | 123.3           | H-6'  | CH              | 6.95             | dd, J <sub>1</sub> = 8.3, J <sub>2</sub> = 2.0 Hz, 1H                         | H-2', H-5'   | -                    | H-2', H-5', H-7'    |
| 7'             | 148.0           | H-7'  | CH              | 7.59             | d, J = 16.0 Hz, 1H                                                            | H-8'         | H-8'                 | H-2', H-6'          |
| 8'             | 114.6           | H-8'  | CH              | 6.28             | d, J = 16.0 Hz, 1H                                                            | H-7'         | H-7'                 | H-7'                |
| 9'             | 168.4           | -     | C=O             | -                | -                                                                             | -            | -                    | H-7', H-8', H-4''   |
| β-D-glucose    |                 |       |                 |                  |                                                                               |              |                      |                     |
| 1''            | 104.0           | H-1'' | CH              | 4.38             | d, J = 7.8 Hz, 1H                                                             | H-2''        | H-2''                | H-2'', H-8b         |
| 2''            | 76.1            | H-2'' | CH              | 3.39             | dd, J <sub>1</sub> = 9.0, J <sub>2</sub> = 8.0 Hz, 1H                         | H-1'', H-3'' | -                    | H-3'', H-4'', H-5'' |



| #            | <sup>13</sup> C | HSQC   | DEPT-135        | δ <sup>1</sup> H | Multiplicity, ( <i>J</i> , Hz)                                      | COSY             | NOESY           | HMBC                 |
|--------------|-----------------|--------|-----------------|------------------|---------------------------------------------------------------------|------------------|-----------------|----------------------|
| 3''          | 81.7            | H-3''  | CH              | 3.81             | t, <i>J</i> = 9.3 Hz, 1H                                            | H-4''            | H-1'''          | H-2'', H-4'', H-1''' |
| 4''          | 70.5            | H-4''  | CH              | 4.94             | t, <i>J</i> = 9.8 Hz, 1H                                            | H-3'', *H-5''    | -               | H-3'', H-5'', H-1''' |
| 5''          | 75.8            | H-4''  | CH              | 3.54             | m, 1H                                                               | H-4'', H-6''     | -               | H-3'', H-4''         |
| 6''          | 62.2            | H-6a'' | CH <sub>2</sub> | 3.63             | d, <i>J</i> = 10.0 Hz, 1H                                           | *H-5'', H-6b''   | -               | H-4''                |
|              |                 | H-6b'' |                 | 3.51             | d, <i>J</i> = 10.0 Hz, 1H                                           | *H-5'', H-6a''   | -               | H-4''                |
| α-L-Rhamnose |                 |        |                 |                  |                                                                     |                  |                 |                      |
| 1'''         | 103.0           | H-1''' | CH              | 5.18             | d, <i>J</i> = 1.5 Hz, 1H                                            | H-2'''           | H-3'', H-2'''   | H-3''                |
| 2'''         | 72.3            | H-2''' | CH              | 3.92             | dd, <i>J</i> <sub>1</sub> = 3.1, <i>J</i> <sub>2</sub> = 1.6 Hz, 1H | H-1'''           | H-1'''          | H-1''', *H-4'''      |
| 3'''         | 72.2            | H-3''' | CH              | 3.57             | dd, <i>J</i> <sub>1</sub> = 3.5, <i>J</i> <sub>2</sub> = 9.6 Hz, 1H | H-4''', *H-5'''  | H-5'''          | H-1''', *H-4'''      |
| 4'''         | 73.7            | H-4''' | CH              | *3.28            | d, <i>J</i> = 9.6 Hz, 1H                                            | *H-5'''          | H-6'''          | H-2''', H-5'''       |
| 5'''         | 70.3            | H-5''' | CH              | *3.52            | m, 1H                                                               | *H-4''', *H-6''' | H-6'''          | H-1''', H-6'''       |
| 6'''         | 18.4            | H-6''' | CH <sub>3</sub> | 1.09             | d, <i>J</i> = 6.2 Hz, 3H                                            | *H-5'''          | H-4''', *H-5''' | H-4'''               |

\* Unclear due to overlapping

**Table S5:** NMR spectroscopic data of metabolite **7** (martynoside), (CD<sub>3</sub>OD, 500 MHz).

| #                      | <sup>13</sup> C | HSQC | DEPT 135 | δ <sup>1</sup> H | Multiplicity, (J, Hz) | COSY | NOESY | HMBC |
|------------------------|-----------------|------|----------|------------------|-----------------------|------|-------|------|
| <b>Phenethyl group</b> |                 |      |          |                  |                       |      |       |      |

| #              | <sup>13</sup> C | HSQC | DEPT 135        | δ <sup>1</sup> H | Multiplicity, (J, Hz)                                 | COSY       | NOESY                   | HMBC                              |
|----------------|-----------------|------|-----------------|------------------|-------------------------------------------------------|------------|-------------------------|-----------------------------------|
| 1              | 132.9           | -    | C               | -                | -                                                     | -          | -                       | H-5, H-7                          |
| 2              | 117.1           | H-2  | CH              | 6.74             | d, J = 2.0 Hz, 1H                                     | -          | -                       | H-7                               |
| 3              | 147.5           | -    | C               | -                | -                                                     | -          | -                       | H-2, H-5, H-6, 4-OCH <sub>3</sub> |
| 4              | 147.6           | -    | C               | -                | -                                                     | -          | -                       | H-2, H-5, H-6, 4-OCH <sub>3</sub> |
| 5              | 112.9           | H-5  | CH              | 7.19             | d, J = 6.6 Hz, 1H                                     | H-6        | H-6, 4-OCH <sub>3</sub> | -                                 |
| 6              | 121.2           | H-6  | CH              | 6.69             | dd, J <sub>1</sub> = 8.0, J <sub>2</sub> = 2.1 Hz, 1H | H-5        | H-5                     | H-2, H-5, H-7                     |
| 7              | 36.6            | H-7  | CH <sub>2</sub> | 2.81             | m, 2H                                                 | H-8a, H-8b | H-8a, H-8b              | H-2                               |
| 8              | 72.4            | H-8a | CH <sub>2</sub> | 4.03             | m, 1 H                                                | H-7, H-8b  | H-7, H-8b               | H-1'', H-7                        |
|                |                 | H-8b |                 | 3.75             | m, 1 H                                                | H-7, H-8a  | H-7, H-8a               |                                   |
| Feruloyl group |                 |      |                 |                  |                                                       |            |                         |                                   |
| 1'             | 127.7           | -    | C               | -                | -                                                     | -          | -                       | H-5', H-8'                        |
| 2'             | 111.8           | H-2' | CH              | 7.20             | d, J = 2.0 Hz, 1H                                     | -          | 3'-OCH <sub>3</sub>     | H-6', H- 7'                       |
| 3'             | 149.4           | -    | C               | -                | -                                                     | -          | -                       | H-2', H- 5', 3'-OCH <sub>3</sub>  |
| 4'             | 150.8           | -    | C               | -                | -                                                     | -          | -                       | H-2', H- 5', H-6'                 |
| 5'             | 116.5           | H-5' | CH              | 6.84             | d, J = 7.2 Hz, 1H                                     | H-6'       | H-6'                    | -                                 |
| 6'             | 124.4           | H-6' | CH              | 7.09             | dd, J <sub>1</sub> = 8.3, J <sub>2</sub> = 2.0 Hz, 1H | H-5'       | H-5'                    | H-2'                              |
| 7'             | 147.4           | H-7' | CH              | 7.66             | d, J = 16.0 Hz, 1H                                    | H-8'       | H-8'                    | H-2', H-6'                        |

| #           | <sup>13</sup> C | HSQC   | DEPT 135        | δ <sup>1</sup> H | Multiplicity, (J, Hz)                                 | COSY   | NOESY          | HMBC              |
|-------------|-----------------|--------|-----------------|------------------|-------------------------------------------------------|--------|----------------|-------------------|
| 8'          | 115.2           | H-8'   | CH              | 6.37             | d, J = 16.0 Hz, 1H                                    | H-7'   | H-7'           | -                 |
| 9'          | 168.2           | -      | C=O             | -                | -                                                     | -      | -              | H-7', H-8', H-4'' |
| β-D-Glucose |                 |        |                 |                  |                                                       |        |                |                   |
| 1''         | 104.3           | H-1''  | CH              | 4.37             | d, J = 8.0 Hz, 1H                                     | H-2''  | -              | H-2''             |
| 2''         | 76.2            | H-2''  | CH              | 3.38             | dd, J <sub>1</sub> = 9.2, J <sub>2</sub> = 7.8 Hz, 1H | H-1''  | -              | H-3''             |
| 3''         | 80.6            | H-3''  | CH              | 3.80*            | m, 1H*                                                | H-4''* | -              | H-2', H-1'''      |
| 4''         | 70.4            | H-4''  | CH              | 4.92             | *                                                     | H-3''  | -              | H-3', H-1'''      |
| 5''         | 75.1            | H-5''  | CH              | 3.53             | m, 1H*                                                | -      | -              | H-3', H-4''       |
| 6''         | 62.4            | H-6a'' | CH <sub>2</sub> | 3.64             | m, 1H*                                                | H-6b'' | *              | -                 |
|             |                 | H-6b'' |                 | 3.53             | m, 1H*                                                | H-6a'' | *              | -                 |
| α-L-Rhamose |                 |        |                 |                  |                                                       |        |                |                   |
| 1'''        | 103.0           | H-1''' | CH              | 5.19             | d, J = 2.0 Hz, 1H                                     | -      | *H-3'', H-4''' | *H-3''            |
| 2'''        | 72.3            | H-2''' | CH              | 3.91             | dd, J <sub>1</sub> = 5.5, J <sub>2</sub> = 2.5 Hz, 1H | H-1''' | H-1'''         | H-1'''            |
| 3'''        | 72.0            | H-3''' | CH              | 3.56             | m, 1H*                                                | -      | -              | -                 |
| 4'''        | 73.7            | H-4''' | CH              | 3.29             | m, 1H*                                                | -      | -              | H-6'''            |
| 5'''        | 70.9            | H-5''' | CH              | 3.57             | m, 1H*                                                | -      | -              | H-6'''            |
| 6'''        | 18.4            | H-6''' | CH <sub>3</sub> | 1.09             | d, J = 6.2 Hz, 3H                                     | H-5''' | H-5'''         | H-4'''            |

| #                   | <sup>13</sup> C | HSQC                | DEPT 135        | δ <sup>1</sup> H | Multiplicity, (J, Hz) | COSY | NOESY | HMBC |
|---------------------|-----------------|---------------------|-----------------|------------------|-----------------------|------|-------|------|
| 4-OCH <sub>3</sub>  | 56.5            | 4-OCH <sub>3</sub>  | CH <sub>3</sub> | 3.81             | s, 3H                 | -    | -     | -    |
| 3'-OCH <sub>3</sub> | 56.5            | 3'-OCH <sub>3</sub> | CH <sub>3</sub> | 3.89             | s, 3H                 | -    | -     | -    |

\* Unclear due to overlapping

**Table S6:** NMR spectroscopic data of metabolite **8** (forsythoside B), (CD<sub>3</sub>OD, 500 MHz).

| #               | <sup>13</sup> C | HSQC | DEPT-135        | δ <sup>1</sup> H | Multiplicity, ( <i>J</i> , Hz)                                      | COSY       | NOESY                | HMBC                 |
|-----------------|-----------------|------|-----------------|------------------|---------------------------------------------------------------------|------------|----------------------|----------------------|
| Phenethyl group |                 |      |                 |                  |                                                                     |            |                      |                      |
| 1               | 131.4           | -    | C               | -                | -                                                                   | -          | -                    | H-5, H-7, H-8a, H-8b |
| 2               | 117.1           | H-2  | CH              | 6.70             | d, <i>J</i> = 2.0 Hz, 1H                                            | H-6        | H-7, H-8a, H-8b      | H-6, H-7             |
| 3               | 146.1           | -    | C               | -                | -                                                                   | -          | -                    | H-2, H-5, H-6        |
| 4               | 144.7           | -    | C               | -                | -                                                                   | -          | -                    | H-2, H-6             |
| 5               | 116.5           | H-5  | CH              | 6.68             | d, <i>J</i> = 8.0 Hz, 1H                                            | H-6        | -                    | H-6                  |
| 6               | 121.3           | H-6  | CH              | 6.57             | dd, <i>J</i> <sub>1</sub> = 8.0, <i>J</i> <sub>2</sub> = 2.0 Hz, 1H | H-2, H-5   | H-7, H-8a, H-8b      | H-2, H-5             |
| 7               | 36.6            | H-7  | CH <sub>2</sub> | 2.80             | m, 2H                                                               | H-8a, H-8b | H-2, H-6, H-8a, H-8b | H-6, H-2, H-8a, H-8b |
| 8               | 72.1            | H-8a | CH <sub>2</sub> | 4.00             | m, 1H                                                               | H-7, H-8b  | H-2, H-6, H-7, H-8b  | H-1'', H-7           |
|                 |                 | H-8b |                 | 3.72             | m, 1H                                                               | H-7, H-8a  | H-2, H-6, H-7, H-8a  | H-1'', H-7           |
| Caffeoyl group  |                 |      |                 |                  |                                                                     |            |                      |                      |
| 1'              | 127.6           | -    | C               | -                | -                                                                   | -          | -                    | H-5', H-7', H-8'     |

| #            | <sup>13</sup> C | HSQC   | DEPT-135        | δ <sup>1</sup> H | Multiplicity, (J, Hz)                                      | COSY          | NOESY   | HMBC                 |
|--------------|-----------------|--------|-----------------|------------------|------------------------------------------------------------|---------------|---------|----------------------|
| 2'           | 114.7           | H-2'   | CH              | 7.06             | d, J = 2.0 Hz, 1H                                          | H-6'          | -       | -                    |
| 3'           | 146.8           | -      | C               | -                | -                                                          | -             | -       | H-2', H-5'           |
| 4'           | 149.8           | -      | C               | -                | -                                                          | -             | -       | H-2', H-5', H-6'     |
| 5'           | 117.2           | H-5'   | CH              | 6.78             | d, J = 8.2 Hz, 1H                                          | H-6'-         | -       | H-6'                 |
| 6'           | 123.3           | H-6'   | CH              | 6.96             | dd, J <sub>1</sub> = 8.2, J <sub>2</sub> = 2.0 Hz, 1H      | H-5', H-2'    | -       | H-2', H-7'           |
| 7'           | 148.1           | H-7'   | CH              | 7.60             | d, J = 15.7 Hz, 1H                                         | H-8', H-6'    | H-8'    | H-2', H-6'           |
| 8'           | 115.2           | H-8'   | CH              | 6.28             | d, J = 15.7 Hz, 1H                                         | H-7'-         | H-7'    | H-6', H-7'           |
| 9'           | 168.2           | -      | C=O             | -                | -                                                          | -             | -       | H-7', H-8', H-4''    |
| β-D-Glucose  |                 |        |                 |                  |                                                            |               |         |                      |
| 1''          | 104.3           | H-1''  | CH              | 4.37             | d, J = 7.9 Hz, 1H                                          | H-2'',        | H-2''   | H-8a, H-2'', H-5''   |
| 2''          | 76.2            | H-2''  | CH              | 3.38             | dd, J <sub>1</sub> = 8.9, J <sub>2</sub> = 8.2 Hz, 1H      | H-1'', H-3''  | H-1''   | H-3''                |
| 3''          | 81.7            | H-3''  | CH              | 3.80             | t, J = 9.3 Hz, 1H                                          | H-2'', H-4''  | H-1'''  | H-1''', H-2'', H-4'' |
| 4''          | 70.5            | H-4''  | CH              | 4.94             | t, J = 9.4 Hz, 1H                                          | H-3''         | -       | H-1''', H-3''        |
| 5''          | 75.1            | H-5''  | CH              | 3.73             | m, 1H overlap                                              | H-4'', H-6b'' |         | H-4''                |
| 6''          | 68.5            | H-6a'' | CH <sub>2</sub> | 3.74             | m, 1H                                                      | H-5'', H-6b'' |         | H-4'', H-1''''       |
|              |                 | H-6b'' |                 | 3.48             | dd, J <sub>1</sub> = 11.6 Hz, J <sub>2</sub> = 6.42 Hz, 1H | H-5'', H-6a'' | H-1'''' | H-4'', H-1''''       |
| α-L-Rhamnose |                 |        |                 |                  |                                                            |               |         |                      |

| #                 | <sup>13</sup> C | HSQC     | DEPT-135        | δ <sup>1</sup> H | Multiplicity, (J, Hz)                                  | COSY              | NOESY                    | HMBC                            |
|-------------------|-----------------|----------|-----------------|------------------|--------------------------------------------------------|-------------------|--------------------------|---------------------------------|
| 1'''              | 103.1           | H-1'''   | CH              | 5.18             | d, J = 1.5 Hz, 1H                                      | H-2'''            | H-3'', H-4''             | H-3''                           |
| 2'''              | 72.4            | H-2'''   | CH              | 3.91             | m, 1H                                                  | H-1''', H-3'''    | H-1''', H-3''            | -                               |
| 3'''              | 72.3            | H-3'''   | CH              | 3.55             | dd, J <sub>1</sub> = 9.35, J <sub>2</sub> = 3.4 Hz, 1H | H-2''', H-4'''    |                          | -                               |
| 4'''              | 73.8            | H-4'''   | CH              | 3.29             | *d, J = 9.4 Hz, 1H                                     | H-3''', H-5'''    | H-6'''                   | H-5''', H-6'''                  |
| 5'''              | 70.9            | H-5'''   | CH              | 3.56             | *m, 1H                                                 | H-4''', H-6'''    | H-6'''                   | H-1''', H-6''', H-3'''          |
| 6'''              | 18.5            | H-6'''   | CH <sub>3</sub> | 1.08             | d, J = 6.3 Hz, 3H                                      | H-5'''            | H-3''', H-5'''           | H-4'''                          |
| <b>β-D-Apiose</b> |                 |          |                 |                  |                                                        |                   |                          |                                 |
| 1''''             | 111.1           | H-1''''  | CH              | 4.90             | d, J = 2.2 Hz, 1H                                      | H-4b''', H-2''''  | H-6b'', H-4b''', H-2'''' | H-2''', H-4b''', H-6a'', H-6b'' |
| 2''''             | 78.1            | H-2''''  | CH              | 3.86             | d, J = 2.2 Hz, 1H                                      | H-1''''           | H-1''''                  | H-5''', H-4b''''                |
| 3''''             | 80.6            | -        | C               | -                | -                                                      | -                 | -                        | H-4b''''                        |
| 4''''             | 75.1            | H-4a'''' | CH <sub>2</sub> | 3.91             | br d, J = 9.6 Hz, 1H                                   | H-4b''', H-5''''  | H-4b''''                 | H-5''''                         |
|                   |                 | H-4b'''' |                 | 3.73             | d, J = 3.4 Hz, 1H                                      | H-4a''', H-5''''  | H-4a''''                 | H-5''''                         |
| 5''''             | 65.7            | H-5''''  | CH <sub>2</sub> | 3.54             | br.s, 2H                                               | H-4a''', H-4b'''' | H-2''''                  | H-4a''', H-2''''                |

\* Unclear due to overlapping

**Table S7:** NMR spectroscopic data of metabolite **9** (allysonoside), (CD<sub>3</sub>OD, 500 MHz).

| #                  | $\uparrow^{13}\text{C}$ | HSQC   | $\delta^1\text{H}$ | Multiplicity , ( $J$ Hz)                       | COSY          | HMBC                    |
|--------------------|-------------------------|--------|--------------------|------------------------------------------------|---------------|-------------------------|
| Phenethyl group    |                         |        |                    |                                                |               |                         |
| 1                  | 131.4                   | -      | -                  | -                                              | -             | H-5, H-7, H-8a, H-8b    |
| 2                  | 117.1                   | H-2    | 6.70               | d, $J = 2.1$ Hz, 1H                            | H-6           | H-6, H-7                |
| 3                  | 146.8                   | -      | -                  | -                                              | -             | H-2, H-6, H-5           |
| 4                  | 144.7                   | -      | -                  | -                                              | -             | H-2, H-6                |
| 5                  | 116.9                   | H-5    | 6.68               | d, $J = 8.0$ Hz, 1H                            | H-6           | H-6                     |
| 6                  | 116.7                   | H-6    | 6.57               | dd, $J_1 = 8.0, J_2 = 2.0$ Hz, 1H              | H-2, H-5      | H-2, H-5                |
| 7                  | 36.9                    | H-7    | 2.80               | ddt, $J_1 = 11.3, J_2 = 7.2, J_3 = 4.1$ Hz, 2H | H-8a, H-8b    | H-6, H-2, H-8a, H-8b    |
| 8                  | 72.8                    | H-8a   | 4.00               | m, 1H                                          | H-7, H-8b     | H-1'', H-7              |
|                    |                         | H-8b   | 3.72               | m, 1H                                          | H-7, H-8a     | H-1'', H-7              |
| Feruloyl group     |                         |        |                    |                                                |               |                         |
| 1'                 | 127.6                   | -      | -                  | -                                              | -             | H-5', H-7', H-8'        |
| 2'                 | 112.4                   | H-2'   | 7.21               | d, $J = 1.8$ Hz, 1H                            | H-6'          |                         |
| 3'                 | 146.1                   | -      | -                  | -                                              | -             | H-2', H-5'              |
| 4'                 | 149.8                   | -      | -                  | -                                              | -             | H-2', H-5', H-6', H-10' |
| 5'                 | 116.6                   | H-5'   | 6.81               | d, $J = 8.0$ Hz, 1H                            | H-6'          | H-6'                    |
| 6'                 | 124.8                   | H-6'   | 7.09               | dd, $J_1 = 8.0, J_2 = 2.0$ Hz, 1H              | H-5'          | H-2', H-7'              |
| 7'                 | 148.2                   | H-7'   | 7.65               | d, $J = 16.0$ Hz, 1H                           | H-8'          | H-2', H-6'              |
| 8'                 | 115.1                   | H-8'   | 6.37               | d, $J = 16.0$ Hz, 1H                           | H-7'          | H-6', H-7'              |
| 9'                 | 168.2                   | -      | -                  | -                                              | -             | H-7', H-8', H-4''       |
| 10'                | 56.7                    | H-10'  | 3.89               | s, 3H                                          | H-2'          | -                       |
| $\beta$ -D-Glucose |                         |        |                    |                                                |               |                         |
| 1''                | 104.3                   | H-1''  | 4.37               | d, $J = 7.9$ Hz, 1H                            | H-2''         | H-8a, H-5'', H-2''      |
| 2''                | 76.2                    | H-2''  | 3.38               | dd, $J_1 = 9.0, J_2 = 8.0$ Hz, 1H              | H-1'', H-3''  | H-3''                   |
| 3''                | 81.7                    | H-3''  | 3.80               | t, $J = 9.0$ Hz, 1H                            | H-2'', H-4''  | H-1''', H-2'', H-4''    |
| 4''                | 70.5                    | H-4''  | 4.94               | t, 9.8 Hz, 1H                                  | H-3'', H-5''  | H-1''', H-3''           |
| 5''                | 75.1                    | H-5''  | 3.72               | d, $J = 9.5$ Hz, 1H                            | H-4'', H-6b'' | H-4''                   |
| 6''                | 68.5                    | H-6a'' | 3.75               | m, 1H                                          | H-5'', H-6b'' | H-4'', H-1'''           |

| #                                     | $^{13}\text{C}$ | HSQC     | $\delta^1\text{H}$ | Multiplicity, ( $J$ Hz)              | COSY             | HMBC                               |
|---------------------------------------|-----------------|----------|--------------------|--------------------------------------|------------------|------------------------------------|
|                                       |                 | H-6b''   | 3.48               | br.d, $J = 5.2$ Hz, 1H               | H-5'', H-6a''    | H-4'', H-1''''                     |
| <b><math>\alpha</math>-L-Rhamnose</b> |                 |          |                    |                                      |                  |                                    |
| 1'''                                  | 103.1           | H-1'''   | 5.19               | d, $J = 1.67$ Hz, 1H                 | H-2'''           | H-3''                              |
| 2'''                                  | 72.4            | H-2'''   | 3.90               | m, 1H                                | H-1''', H-3'''   | -                                  |
| 3'''                                  | 72.3            | H-3'''   | 3.55               | m, 1H                                | H-2''', H-4'''   | -                                  |
| 4'''                                  | 73.8            | H-4'''   | 3.28               | dd, $J_1 = 9.1$ , $J_2 = 1.4$ Hz, 1H | H-3''', H-5'''   | H-5''', H-6'''                     |
| 5'''                                  | 70.9            | H-5'''   | 3.56               | * overlap                            | H-4''', H-6'''   | H-1''', H-6''', H-3''              |
| 6'''                                  | 18.5            | H-6'''   | 1.09               | d, $J = 6.0$ Hz, 3H                  | H-5'''           | H-4'''                             |
| <b><math>\beta</math>-D-Apiose</b>    |                 |          |                    |                                      |                  |                                    |
| 1''''                                 | 111.1           | H-1''''  | 4.90               | d, $J = 2.2$ Hz, 1H                  | H-2''''          | H-2''', H-4b''',<br>H-6a'', H-6b'' |
| 2''''                                 | 78.1            | H-2''''  | 3.86               | d, $J = 2.1$ Hz, 1H                  | H-1''''          | H-5''', H-4b'''                    |
| 3''''                                 | 80.6            | -        | -                  | -                                    | -                | H-4b'''                            |
| 4''''                                 | 75.1            | H-4a'''' | 3.92               | d, $J = 9.4$ Hz, 1H                  | H-4b''', H-5'''' | H-5''''                            |
|                                       |                 | H-4b'''' | 3.73               | d, $J = 9.5$ Hz, 1H                  | H-4a''', H-5'''' | H-5''''                            |
| 5''''                                 | 65.7            | H-5''''  | 3.53               | brs, 2H                              | H-4a''', H-4b''' | H-4a''', H-2'''                    |



**Table S8:** NMR spectroscopic data of metabolite **10** (echinacoside), (CD<sub>3</sub>OD, 500 MHz).

| #               | <sup>13</sup> C | HSQC | DEPT-135        | δ <sup>1</sup> H | Multiplicity, (J, Hz)                                 | COSY       | NOESY                | HMBC                 |
|-----------------|-----------------|------|-----------------|------------------|-------------------------------------------------------|------------|----------------------|----------------------|
| Phenethyl group |                 |      |                 |                  |                                                       |            |                      |                      |
| 1               | 131.5           | -    | C               | -                | -                                                     | -          | -                    | H-5, H-7, H-8        |
| 2               | 117.2           | H-2  | CH              | 6.70             | d, J = 2.0 Hz, 1H                                     | H-6        | H-7                  | H-6, H-7             |
| 3               | 146.1           | -    | C               | -                | -                                                     | -          | -                    | H-5                  |
| 4               | 144.7           | -    | C               | -                | -                                                     | -          | -                    | H-2, H-6             |
| 5               | 116.5           | H-5  | CH              | 6.67             | d, J = 8.0 Hz, 1H                                     | H-6        | -                    | H-6, H-7             |
| 6               | 121.3           | H-6  | CH              | 6.57             | dd, J <sub>1</sub> = 8.0, J <sub>2</sub> = 2.0 Hz, 1H | H-2        | -                    | H-2, H-7             |
| 7               | 36.6            | H-7  | CH <sub>2</sub> | 2.79             | dt J = 7.2, J <sub>2</sub> = 2.5 Hz, 1H               | H-8a, H-8b | H-2, H-6, H-8a, H-8b | H-2, H-6, H-8a, H-8b |
| 8               | 72.0            | H-8a | CH <sub>2</sub> | 4.03             | m, 1H                                                 | H-7, H-8b  | H-8                  | H-7, H-1''           |
|                 |                 | H-8b |                 | 3.73             | m, 1H                                                 | H-7, H-8a  | H-7                  |                      |
| Caffeoyl group  |                 |      |                 |                  |                                                       |            |                      |                      |
| 1'              | 127.6           | -    | C               | -                | -                                                     | -          | -                    | H-5', H-7'           |
| 2'              | 115.2           | H-2' | CH              | 7.06             | d, J = 2.0 Hz, 1H                                     | H-6'       | -                    | H-6', H-8'           |
| 3'              | 146.9           | -    | C               | -                | -                                                     | -          | -                    | H-2', H-5'           |
| 4'              | 149.9           | -    | C               | -                | -                                                     | -          | -                    | H-2', H-5', H-6'     |
| 5'              | 116.3           | H-5' | CH              | 6.77             | d, J = 8.0 Hz, 1H                                     | H-6'       | -                    | H-6'                 |

| #                   | <sup>13</sup> C | HSQC   | DEPT-135        | δ <sup>1</sup> H | Multiplicity, (J, Hz)                                  | COSY           | NOESY          | HMBC                   |
|---------------------|-----------------|--------|-----------------|------------------|--------------------------------------------------------|----------------|----------------|------------------------|
| 6'                  | 123.3           | H-6'   | CH              | 6.96             | dd, J <sub>1</sub> = 8.35, J <sub>2</sub> = 2.1 Hz, 1H | H-2, H-5'      | -              | H-2', H-8'             |
| 7'                  | 114.7           | H-7'   | CH              | 7.60             | d, J = 15.9 Hz, 1H                                     | H-8'           | H-8'           | H-6', H-8'             |
| 8'                  | 148.3           | H-8'   | CH              | 6.27             | d, J = 15.9 Hz, 1H                                     | H-7'           | H-7'           | H-2', H-6'             |
| 9'                  | 168.5           | -      | C=O             | -                | -                                                      | -              | -              | H-4'', H-7', H-8'      |
| Central β-D-Glucose |                 |        |                 |                  |                                                        |                |                |                        |
| 1''                 | 104.3           | H-1''  | CH              | 4.39             | d, J = 8.0 Hz, 1H                                      | H-2''          | H-2''          | H-8a, H-8b, H-2''      |
| 2''                 | 76.2            | H-2''  | CH              | 3.39             | dd, J <sub>1</sub> = 9.17, J <sub>2</sub> = 8.0 Hz, 1H | H-1'', H-3''   | -              | H-3''                  |
| 3''                 | 81.7            | H-3''  | CH              | 3.80             | t, J = 9.2 Hz, 1H                                      | H-2'', H-4''   | H-1'''         | H-2'', H-4'', H-1'''   |
| 4''                 | 70.5            | H-4''  | CH              | 5.00             | t J = 9.6 Hz, 1H                                       | H-3''          | -              | H-5'', H-3'', H-1'''   |
| 5''                 | 74.8            | H-5''  | CH              | 3.77             | dd, J <sub>1</sub> = 9.1, J <sub>2</sub> = 2.3 Hz, 1H  | H-4'', H-6a''  | -              | H-4'', H-6b''          |
| 6''                 | 69.4            | H-6a'' | CH <sub>2</sub> | 3.94             | dd, J <sub>1</sub> = 11.5, J <sub>2</sub> = 2.0 Hz, 1H | H-5'', H-6b''  | -              | H-1''''                |
|                     |                 | H-6b'' |                 | 3.63             | d, J <sub>1</sub> = 12.0 Hz, 1H                        | H-5'', H-6a''  | -              |                        |
| α-L-Rhamnose        |                 |        |                 |                  |                                                        |                |                |                        |
| 1'''                | 103.1           | H-1''' | CH              | 5.18             | d, J = 1.7 Hz, 1H                                      | H-2'''         | H-2''', H-3''' | H-2''', H-3''', H-5''' |
| 2'''                | 72.4            | H-2''' | CH              | 3.91             | dd, J <sub>1</sub> = 3.2, J <sub>2</sub> = 1.7 Hz, 1H  | H-1'''         | H-1'''         | H-1''', H-3'''         |
| 3'''                | 72.4            | H-3''' | CH              | 3.57             | dd, J <sub>1</sub> = 9.6, J <sub>2</sub> = 3.2 Hz, 1H  | H-4''', H-2''' | H-5'''         | H-1''', H-2''', H-4''' |
| 4'''                | 73.8            | H-4''' | CH              | 3.28             | d, J = 9.5 Hz, 1H                                      | H-3'''         | H-6'''         | H-2''', H-3''', H-6''' |

| #                        | <sup>13</sup> C | HSQC     | DEPT-135        | δ <sup>1</sup> H | Multiplicity, (J, Hz)                                 | COSY           | NOESY                  | HMBC                    |
|--------------------------|-----------------|----------|-----------------|------------------|-------------------------------------------------------|----------------|------------------------|-------------------------|
| 5'''                     | 70.6            | H-5'''   | CH              | 3.56             | dd, J <sub>1</sub> = 9.6, J <sub>2</sub> = 6.2 Hz, 1H | H-4''', H-6''' | H-6'''                 | H-1''', H-4''', H-6'''  |
| 6'''                     | 18.4            | H-6'''   | CH <sub>3</sub> | 1.08             | d, J = 6.0 Hz, 3H                                     | H-5'''         | H-4''', H-5'''         | H-4'''                  |
| <b>Final β-D-Glucose</b> |                 |          |                 |                  |                                                       |                |                        |                         |
| 1''''                    | 104.7           | H-1''''  | CH              | 4.29             | d, J = 7.8 Hz, 1H                                     | H-2''''        | H-2'''' H-6a'', H-6b'' | H-6a'', H-6b'', H-2'''' |
| 2''''                    | 75.1            | H-2''''  | CH              | 3.20             | dd, J <sub>1</sub> = 9.1, J <sub>2</sub> = 7.8 Hz, 1H | H-1''''        | H-1''''                | H-6b'', H-3''''         |
| 3''''                    | 77.8            | H-3''''  | CH              | 3.22             | t, J = 16.1 Hz, 1H                                    | n.o. *overlap  | *overlap               | H-2''''                 |
| 4''''                    | 71.5            | H-4''''  | CH              | 3.26             | m, 1H                                                 | n.o. overlap   | overlap                | H-3''''                 |
| 5''''                    | 77.9            | H-5''''  | CH              | 3.34             | m, 1H                                                 | n.o. overlap   | overlap                | H-4''''                 |
| 6''''                    | 62.6            | H-6a'''' | CH <sub>2</sub> | 3.82             | m, 1H                                                 | H-6b''''       | H-6b''''               | H-4''''                 |
|                          |                 | H-6b'''' |                 | 3.65             | d, J = 5.2 Hz, 1H                                     | H-6a''''       | H-6a''''               |                         |

**Table S9:** NMR spectroscopic data of metabolite **13** (chlorogenic acid), (CD<sub>3</sub>OD, 500 MHz).

| #                     | <sup>13</sup> C | DEPT 135        | HSQC              | δ <sup>1</sup> H | Multiplicity, (J, Hz)                                                                              | COSY                                       | HMBC                                                                              |
|-----------------------|-----------------|-----------------|-------------------|------------------|----------------------------------------------------------------------------------------------------|--------------------------------------------|-----------------------------------------------------------------------------------|
| <b>Quinic group</b>   |                 |                 |                   |                  |                                                                                                    |                                            |                                                                                   |
| 1                     | 77.8            | C               | -                 | -                | -                                                                                                  | -                                          | -                                                                                 |
| 2                     | 39.1            | CH <sub>2</sub> | H-2 <sub>eq</sub> | 1.99             | dd, <i>J</i> <sub>1</sub> = 15.0, <i>J</i> <sub>2</sub> = 3.2 Hz, 1H                               | H-3, H-5, H-2 <sub>ax</sub>                | -                                                                                 |
|                       |                 |                 | H-2 <sub>ax</sub> | 2.10             | m, 1H                                                                                              | H-3, H-5, H-2 <sub>eq</sub>                |                                                                                   |
| 3                     | 73.1            | CH              | H-3               | 4.15             | br.s, 1H                                                                                           | H-2 <sub>ax</sub> , H-4, H-2 <sub>eq</sub> | H4, H-2 <sub>ax</sub> , H-2 <sub>eq</sub>                                         |
| 4                     | 75.2            | CH              | H-4               | 3.69             | dd, <i>J</i> <sub>1</sub> = 9.8, <i>J</i> <sub>2</sub> = 3.2 Hz, 1H                                | H-3, H-5                                   | H-2 <sub>ax</sub> , H-2 <sub>eq</sub> , H5, H-6 <sub>ax</sub> , H-6 <sub>eq</sub> |
| 5                     | 72.6            | CH              | H-5               | 5.37             | td, <i>J</i> <sub>1</sub> = 15.0, <i>J</i> <sub>2</sub> = 10.0, <i>J</i> <sub>3</sub> = 5.0 Hz, 1H | H-4, H-6 <sub>ax</sub> , H-6 <sub>eq</sub> | H-4, H-6                                                                          |
| 6                     | 40.6            | CH <sub>2</sub> | H-6 <sub>eq</sub> | 2.15             | dd, <i>J</i> <sub>1</sub> = 14.8, <i>J</i> <sub>2</sub> = 3.0 Hz, 1H                               | H-6 <sub>ax</sub> , H-5                    | -                                                                                 |
|                       |                 |                 | H-6 <sub>ax</sub> | 2.01             | d, <i>J</i> = 12.0 Hz, 1H                                                                          | H-6 <sub>eq</sub> , H-5                    |                                                                                   |
| 7                     | 180.8           | C=O             | -                 | -                | -                                                                                                  | -                                          | -                                                                                 |
| <b>Caffeoyl group</b> |                 |                 |                   |                  |                                                                                                    |                                            |                                                                                   |
| 1'                    | 127.8           | C               | -                 | -                | -                                                                                                  | -                                          | H-5', H-7', H-8'                                                                  |
| 2'                    | 115.1           | CH              | H-2'              | 7.04             | d, <i>J</i> = 2.0 Hz, 1H                                                                           | H-6'                                       | H-6', H-7'                                                                        |
| 3'                    | 146.8           | C               | -                 | -                | -                                                                                                  | -                                          | -                                                                                 |
| 4'                    | 149.5           | C               | -                 | -                | -                                                                                                  | -                                          | H-2', H-5', H-6'                                                                  |
| 5'                    | 116.5           | CH              | H-5'              | 6.76             | d, <i>J</i> = 8.3 Hz, 1H                                                                           | H-6'                                       | H-6'                                                                              |

|    |       |     |      |      |                                      |            |                  |
|----|-------|-----|------|------|--------------------------------------|------------|------------------|
| 6' | 122.9 | CH  | H-6' | 6.93 | dd, $J_1 = 8.3$ , $J_2 = 2.0$ Hz, 1H | H-5', H-7' | H-2', H-7'       |
| 7' | 146.9 | CH  | H-7' | 7.56 | d, $J = 16.0$ Hz, 1H                 | H-8'       | H-2', H-5', H-6' |
| 8' | 115.5 | CH  | H-8' | 6.29 | d, $J = 16.0$ Hz, 1H                 | H-7'       | H-6', H-7'       |
| 9' | 169.1 | C=O | -    | -    | -                                    | -          | H-5, H-7', H-8'  |

**Table S10:** NMR spectroscopic data of metabolite **14** (chlorogenic acid methyl ester), (CD<sub>3</sub>OD, 500 MHz).

| #                     | <sup>13</sup> C | DEPT 135         | HSQC | H    | Multiplicity, (J, Hz)                                  | COSY       | HMBC             |
|-----------------------|-----------------|------------------|------|------|--------------------------------------------------------|------------|------------------|
| <b>Quinic group</b>   |                 |                  |      |      |                                                        |            |                  |
| 1                     | 75.9            | C                | -    | -    | -                                                      | -          | H-2, H-5, H-6    |
| 2                     | 38.1            | CH <sub>2</sub>  | H-2a | 2.20 | m, 1H                                                  | H-3        | H-4              |
|                       |                 |                  | H-2b | 2.21 | dd, $J_1 = 13.7$ , $J_2 = 3.8$ Hz, 1H                  |            |                  |
| 3                     | 70.6            | CH               | H-3  | 4.30 | dt, $J_1 = 6.5$ , $J_2 = 4.8$ Hz, 1H                   | H-2        | H-6a             |
| 4                     | 72.4            | CH               | H-4  | 3.73 | dd, $J_1 = 7.5$ , $J_2 = 3.1$ Hz, 1H                   | H-3, H-5   | H-5              |
| 5                     | 72.1            | CH               | H-5  | 5.28 | td, $J_1 = 12.3$ , $J_2 = 7.8$ ,<br>$J_3 = 4.2$ Hz, 1H | H-4        | H-4              |
| 6                     | 38.9            | CH <sub>2</sub>  | H-6a | 2.01 | dd, $J_1 = 12.8$ , $J_2 = 6.4$ Hz, 1H                  | H-5        | -                |
|                       |                 |                  | H-6b | 2.13 | dd, $J_1 = 13.2$ , $J_2 = 7.9$ Hz, 1H                  |            | -                |
| 7                     | 175.5           | C=O              | -    | -    | -                                                      | -          | -                |
| 8                     | 53.1            | OCH <sub>3</sub> | H-8  | 3.68 | s, 3H                                                  | -          | -                |
| <b>Caffeoyl group</b> |                 |                  |      |      |                                                        |            |                  |
| 1'                    | 127.7           | C                | -    | -    | -                                                      | -          | H-5', H-7', H-8' |
| 2'                    | 115.1           | CH               | H-2' | 7.05 | d, $J = 2.0$ Hz, 1H                                    | H-6'       | H-6', H-7'       |
| 3'                    | 146.8           | C                | -    | -    | -                                                      | -          | H-2', H-5', H-6' |
| 4'                    | 149.5           | C                | -    | -    | -                                                      | -          | H-2', H-5', H-6' |
| 5'                    | 116.5           | CH               | H-5' | 6.79 | d, $J = 8.2$ Hz, 1H                                    | H-6'       | -                |
| 6'                    | 123.0           | CH               | H-6' | 6.95 | dd, $J_1 = 8.2$ , $J_2 = 2.0$ Hz, 1H                   | H-2', H-5' | H-2', H-5', H-7' |
| 7'                    | 147.3           | CH               | H-7' | 7.52 | d, $J = 16.0$ Hz, 1H                                   | H-8'       | H-6'             |
| 8'                    | 115.2           | CH               | H-8' | 6.22 | d, $J = 16.0$ Hz, 1H                                   | H-7'       | H-7', H-6'       |
| 9'                    | 168.4           | C=O              | -    | -    | -                                                      | -          | H-5, H-7'        |

**Table S11:** NMR spectroscopic data of metabolite **16** (p-hydroxybenzoic acid), (CD<sub>3</sub>OD, 500 MHz).

| #   | <sup>13</sup> C | HSQC     | $\delta^1\text{H}$ | Multiplicity, (J, Hz) | COSY     | HMBC   |
|-----|-----------------|----------|--------------------|-----------------------|----------|--------|
| 1   | 123.1           | -        | -                  | -                     | -        | H3, H5 |
| 2/6 | 133.0           | H-2, H-6 | 7.87               | d, $J = 8.7$ Hz, 2H   | H-3, H-5 | -      |

|     |       |          |      |                     |          |        |
|-----|-------|----------|------|---------------------|----------|--------|
| 3/5 | 116.0 | H-3, H-5 | 6.80 | d, $J = 8.7$ Hz, 2H | H-2, H-6 | -      |
| 4   | 163.2 | -        | -    | -                   | -        | H2, H6 |
| 7   | 170.4 | -        | -    | -                   | -        | H2, H6 |

**Table S12:** NMR spectroscopic data of metabolite **19** (naringenin), (CD<sub>3</sub>OD, 500 MHz).

| #               | <sup>13</sup> C | $\delta$ <sup>1</sup> H | Multiplicity, $J$ (Hz)                 |
|-----------------|-----------------|-------------------------|----------------------------------------|
| 2               | 80.5            | 5.32                    | dd, $J_1 = 12.9$ , $J_2 = 3.0$ Hz, 1H  |
| 3 <sub>ax</sub> | 44.1            | 3.10                    | dd, $J_1 = 17.1$ , $J_2 = 12.9$ Hz, 1H |
| 3 <sub>eq</sub> |                 | 2.68                    | dd, $J_1 = 17.1$ , $J_2 = 3.0$ Hz, 1H  |
| 4               | 197.7           | -                       | -                                      |
| 5               | 168.6           | -                       | -                                      |
| 6               | 97.1            | 5.89                    | d, $J = 2.1$ Hz, 1H                    |
| 7               | 164.9           | -                       | -                                      |
| 8               | 96.2            | 5.87                    | d, $J = 2.1$ Hz, 1H                    |
| 9               | 165.5           | -                       | -                                      |
| 10              | 103.3           | -                       | -                                      |
| 1'              | 131.1           | -                       | -                                      |
| 2'/6'           | 129.0           | 7.31                    | d, $J = 8.4$ Hz, 2H                    |
| 3'/5'           | 116.3           | 6.81                    | d, $J = 8.4$ Hz, 2H                    |
| 4'              | 159.0           | -                       | -                                      |

**Table S13:** NMR spectroscopic data of metabolite **21** (hesperetin), (CD<sub>3</sub>OD, 500 MHz).

| # | <sup>13</sup> C | HSQC              | $\delta$ <sup>1</sup> H | Multiplicity, ( $J$ , Hz)              | HMBC                                             |
|---|-----------------|-------------------|-------------------------|----------------------------------------|--------------------------------------------------|
| 2 | 80.3            | H-2               | 5.31                    | dd, $J_1 = 12.7$ , $J_2 = 3.0$ Hz, 1H  | H-3 <sub>eq</sub> , H-2', H-6'                   |
| 3 | 44.1            | H-3 <sub>ax</sub> | 2.71                    | dd, $J_1 = 17.1$ , $J_2 = 3.0$ Hz, 1H  | H-2                                              |
|   |                 | H-3 <sub>eq</sub> | 3.06                    | dd, $J_1 = 17.1$ , $J_2 = 12.7$ Hz, 1H |                                                  |
| 4 | 197.6           | -                 | -                       | -                                      | H-2, H-3 <sub>ax</sub> , H-3 <sub>eq</sub> , H-8 |
| 5 | 164.8           | -                 | -                       | -                                      | H-8                                              |
| 6 | 97.1            | H-6               | 5.88                    | d, $J = 2.3$ Hz, 1H                    | H-8                                              |
| 7 | 168.4           | -                 | -                       | -                                      | H-6, H-8                                         |

|                     |       |                     |      |                                   |                                              |
|---------------------|-------|---------------------|------|-----------------------------------|----------------------------------------------|
| 8                   | 96.2  | H-8                 | 5.90 | d, $J = 2.3$ Hz, 1H               | H-6                                          |
| 9                   | 165.5 | -                   | -    | -                                 | H-6                                          |
| 10                  | 103.4 | -                   | -    | -                                 | H-3 <sub>ax</sub> , H-6, H-8                 |
| 1'                  | 133.2 | -                   | -    | -                                 | H-3 <sub>ax</sub> , H-3 <sub>eq</sub> , H-2' |
| 2'                  | 114.6 | H-2'                | 6.95 | d, $J = 2.0$ Hz, 1H               | H-2, H-2', H-6'                              |
| 3'                  | 147.8 | -                   | -    | -                                 | H-5'                                         |
| 4'                  | 149.4 | -                   | -    | -                                 | H-2', H-6', 4'-OCH <sub>3</sub>              |
| 5'                  | 112.6 | H-5'                | 6.93 | d, $J_1 = 8.3$ Hz, 1H             | H-6', 4'-OCH <sub>3</sub>                    |
| 6'                  | 119.3 | H-6'                | 6.91 | dd, $J_1 = 8.3, J_2 = 2.0$ Hz, 1H | H-2, H-5', H-2'                              |
| 4'-OCH <sub>3</sub> | 56.5  | 4'-OCH <sub>3</sub> | 3.86 | s, 3H                             | -                                            |

**Table S14:** NMR spectroscopic data of metabolite **22** (eriodictiol-7-O- $\beta$ -D-glucoside), (CD<sub>3</sub>OD, 500 MHz).

| #             | <sup>13</sup> C | HSQC              | $\delta$ <sup>1</sup> H | Multiplicity, ( $J$ , Hz)           | COSY                                  | HMBC                                       |
|---------------|-----------------|-------------------|-------------------------|-------------------------------------|---------------------------------------|--------------------------------------------|
| Flavone group |                 |                   |                         |                                     |                                       |                                            |
| 2             | 80.7            | H-2               | 5.33                    | dt, $J_1 = 12.8, J_2 = 3.2$ Hz, 1H  | H-3 <sub>ax</sub> , H-3 <sub>eq</sub> | H-3 <sub>ax</sub> , H-2', H-6'             |
| 3             | 44.1            | H-3 <sub>ax</sub> | 3.13                    | dd, $J_1 = 17.3, J_2 = 12.8$ Hz, 1H | H-3 <sub>eq</sub>                     | -                                          |
|               |                 | H-3 <sub>eq</sub> | 2.75                    | dd, $J_1 = 17.3, J_2 = 3.1$ Hz, 1H  |                                       |                                            |
| 4             | 198.8           | -                 | -                       | -                                   | -                                     | H-2, H-3 <sub>ax</sub> , H-3 <sub>eq</sub> |
| 5             | 164.6           | -                 | -                       | -                                   | -                                     | H-6, H-8                                   |
| 6             | 98.0            | H-6               | 6.18                    | dd, $J_1 = 2.2, J_2 = 1.3$ Hz, 1H   | -                                     | H-8                                        |
| 7             | 167.0           | -                 | -                       | -                                   | -                                     | H-1''                                      |
| 8             | 97.0            | H-8               | 6.21                    | dd, $J_1 = 2.2, J_2 = 1.3$ Hz, 1H   | -                                     | H-6                                        |
| 9             | n.o.            | -                 | -                       | -                                   | -                                     | -                                          |
| 10            | 101.2           | -                 | -                       | -                                   | -                                     | -                                          |
| 1'            | 131.7           | -                 | -                       | -                                   | -                                     | H-2, H-6'                                  |
| 2'            | 114.8           | H-2'              | 6.92                    | d, $J = 1.7$ Hz, 1H                 | H-6'                                  | H-2, H-6'                                  |
| 3'            | 146.6           | -                 | -                       | -                                   | -                                     | H-2', H-5'                                 |
| 4'            | 147.0           | -                 | -                       | -                                   | -                                     | H-2'                                       |
| 5'            | 116.3           | H-5'              | 6.78                    | d, $J = 8.0$ Hz, 1H                 | H-6'                                  | -                                          |
| 6'            | 119.3           | H-6'              | 6.80                    | dd, $J_1 = 8.0, J_2 = 1.7$ Hz 1H    | H-2', H-5'                            | H-2, H-2'                                  |



| <i><math>\beta</math>-D-Glucose</i> |       |        |      |                                    |                |              |
|-------------------------------------|-------|--------|------|------------------------------------|----------------|--------------|
| 1''                                 | 101.2 | H-1''  | 4.97 | d, $J = 7.3$ Hz, 1H                | H-2''          | H-2''        |
| 2''                                 | 74.7  | H-2''  | 3.44 | dd, $J_1 = 7.8, J_2 = 6.2$ Hz, 1H  | H-1''          | H-5''        |
| 3''                                 | 77.8  | H-3''  | 3.40 | m, 1H                              | H-4''          | H-2'', H-4'' |
| 4''                                 | 71.2  | H-4''  | 3.39 | dd, $J_1 = 9.6, J_2 = 7.3$ Hz, 1H  | H-3''          | H-5''        |
| 5''                                 | 78.3  | H-5''  | 3.46 | m, 1H                              | H-6a'', H-6b'' | H-2'', H-4'' |
| 6''                                 | 62.4  | H-6a'' | 3.88 | dt, $J_1 = 12.2, J_2 = 2.2$ Hz, 1H | H-5'', H-6b''  | H-4''        |
|                                     |       | H-6b'' | 3.69 | dd, $J_1 = 12.2, J_2 = 3.2$ Hz, 1H | H-5'', H-6a''  |              |

**Table S15:** NMR spectroscopic data of metabolite **23** (quercetin), (CD<sub>3</sub>OD, 500 MHz).

| #  | <sup>13</sup> C | HSQC | DEPT-135 | $\delta$ <sup>1</sup> H | Multiplicity, ( $J$ , Hz)     | COSY | HMBC             |
|----|-----------------|------|----------|-------------------------|-------------------------------|------|------------------|
| 2  | 148.1           | -    | C        | -                       | -                             | -    | H-2', H-6'       |
| 3  | 137.3           | -    | C        | -                       | -                             | -    | -                |
| 4  | 177.4           | -    | C        | -                       | -                             | -    | -                |
| 5  | 162.5           | -    | C        | -                       | -                             | -    | H-6              |
| 6  | 99.3            | H-6  | CH       | 6.18                    | d, $J = 2.1$ Hz               | H-8  | H-8              |
| 7  | 165.6           | -    | C        | -                       | -                             | -    | H-6, H-8         |
| 8  | 94.4            | H-8  | CH       | 6.39                    | d, $J = 2.1$ Hz               | H-6  | H-6              |
| 9  | 158.2           | -    | C        | -                       | -                             | -    | H-8              |
| 10 | 104.5           | -    | C        | -                       | -                             | -    | H-6, H-8         |
| 1' | 124.1           | -    | C        | -                       | -                             | -    | H-5'             |
| 2' | 116.0           | H-2' | CH       | 7.73                    | d, $J = 2.1$ Hz               | H-6' | H-6', H-5'       |
| 3' | 146.2           | -    | C        | -                       | -                             | -    | H-2', H-5'       |
| 4' | 148.8           | -    | C        | -                       | -                             | -    | H-2', H-6', H-5' |
| 5' | 116.2           | H-5' | CH       | 6.88                    | d, $J = 8.7$ Hz               | H-6' | H-6'             |
| 6' | 121.7           | H-6' | CH       | 7.63                    | dd, $J_1 = 8.7, J_2 = 2.1$ Hz | H-5' | H-2'             |

**Table S16:** NMR spectroscopic data of metabolite **24** (isoquercetin), (CD<sub>3</sub>OD, 500 MHz).

| #              | <sup>13</sup> C | HSQC | $\delta$ <sup>1</sup> H | Multiplicity, ( $J$ , Hz) | COSY | HMBC |
|----------------|-----------------|------|-------------------------|---------------------------|------|------|
| Flavonol group |                 |      |                         |                           |      |      |

| #                  | <sup>13</sup> C | HSQC   | δ <sup>1</sup> H | Multiplicity, (J, Hz)                                                       | COSY          | HMBC         |
|--------------------|-----------------|--------|------------------|-----------------------------------------------------------------------------|---------------|--------------|
| 2                  | 159.0           | -      | -                | -                                                                           | -             | -            |
| 3                  | 135.6           | -      | -                | -                                                                           | -             | H-1''        |
| 4                  | 179.5           | -      | -                | -                                                                           | -             | -            |
| 5                  | 163.1           | -      | -                | -                                                                           | -             | -            |
| 6                  | 99.9            | H-6    | 6.20             | d, J = 2.0 Hz, 1H                                                           | H-8           | H-8          |
| 7                  | 166.2           | -      | -                | -                                                                           | -             | -            |
| 8                  | 94.7            | H-8    | 6.39             | d, J = 2.0 Hz, 1H                                                           | H-6           | H-6          |
| 9                  | 158.5           | -      | -                | -                                                                           | -             | -            |
| 10                 | 105.7           | -      | -                | -                                                                           | -             | -            |
| 1'                 | 123.2           | -      | -                | -                                                                           | -             | -            |
| 2'                 | 117.5           | H-2'   | 7.70             | d, J = 2.2 Hz, 1H                                                           | H-6'          | H-6'         |
| 3'                 | 145.9           | -      | -                | -                                                                           | -             | -            |
| 4'                 | 149.9           | -      | -                | -                                                                           | -             | -            |
| 5'                 | 116.0           | H-5'   | 6.87             | d, J = 8.5 Hz, 1H                                                           | H-6'          | H-6'         |
| 6'                 | 123.1           | H-6'   | 7.59             | dd, J <sub>1</sub> = 8.5, J <sub>2</sub> = 2.2 Hz, 1H                       | H-5'          | H-2', H-5'   |
| <b>β-D-Glucose</b> |                 |        |                  |                                                                             |               |              |
| 1''                | 104.3           | H-1''  | 5.25             | d, J = 7.5 Hz, 1H                                                           | H-2''         | H-2''        |
| 2''                | 75.7            | H-2''  | 3.48             | dd, J <sub>1</sub> = 9.2, J <sub>2</sub> = 7.5 Hz, 1H                       | H-1''         | H-3''        |
| 3''                | 78.1            | H-3''  | 3.42             | t, J = 8.8 Hz, 1H                                                           | H-2'', H-4''  | H-2'', H-4'' |
| 4''                | 71.2            | H-4''  | 3.34             | t, J = 8.8 Hz, 1H                                                           | H-3'', H-5''  | H-3''        |
| 5''                | 78.5            | H-5''  | 3.21             | ddd J <sub>1</sub> = 9.5, J <sub>2</sub> = 5.4, J <sub>3</sub> = 2.4 Hz, 1H | H-6b''        | H-2'', H-4'' |
| 6''                | 62.6            | H-6a'' | 3.71             | dd, J <sub>1</sub> = 11.9, J <sub>2</sub> = 2.4 Hz, 1H                      | H-5'', H-6b'' | H-4''        |

**Table S17:** NMR spectroscopic data of metabolite **25** (luteolin), (CD<sub>3</sub>OD, 500 MHz).

| # | <sup>13</sup> C | δ <sup>1</sup> H | Multiplicity, (J, Hz) |
|---|-----------------|------------------|-----------------------|
| 2 | 166.6           | -                | -                     |
| 3 | 103.8           | 6.53             | s, 1H                 |
| 4 | 183.8           | -                | -                     |
| 5 | 163.2           | -                | -                     |
| 6 | 100.3           | 6.20             | d, J = 2.0 Hz, 1H     |

|    |       |      |                                    |
|----|-------|------|------------------------------------|
| 7  | 166.3 | -    | -                                  |
| 8  | 95.1  | 6.43 | d, $J = 2.0$ Hz, 1H                |
| 9  | 159.4 | -    | -                                  |
| 10 | 105.1 | -    | -                                  |
| 1' | 120.3 | -    | -                                  |
| 2' | 114.1 | 7.37 | d, $J = 2.5$ Hz,, 1H               |
| 3' | 147.1 | -    | -                                  |
| 4' | 151.1 | -    | -                                  |
| 5' | 116.8 | 6.90 | d, $J = 8.5$ Hz,, 1H               |
| 6' | 123.6 | 7.39 | dd, $J_1 = 8.5, J_2 = 2.5$ Hz,, 1H |

**Table S18:** NMR spectroscopic data of metabolite **26** (luteolin-7-O- $\beta$ -D-glucoside), (CD<sub>3</sub>OD, 500 MHz).

| #                                   | <sup>13</sup> C | HSQC | $\delta^1\text{H}$ | Multiplicity, ( $J$ , Hz)         | COSY       | HMBC          |
|-------------------------------------|-----------------|------|--------------------|-----------------------------------|------------|---------------|
| <b>Flavone group</b>                |                 |      |                    |                                   |            |               |
| 2                                   | 167.2           | -    | -                  | -                                 | -          | H-3           |
| 3                                   | 103.8           | H-3  | 6.59               | s, 1H                             | -          | -             |
| 4                                   | 184.1           | -    | -                  | -                                 | -          | H-3           |
| 5                                   | 164.8           | -    | -                  | -                                 | -          | H-6, H-8      |
| 6                                   | 101.1           | H-6  | 6.50               | d, $J = 2.1$ Hz, 1H               | H-8        | H-8           |
| 7                                   | 164.8           | -    | -                  | -                                 | -          | H-1''         |
| 8                                   | 96.1            | H-8  | 6.80               | d, $J = 2.1$ Hz, 1H               | H-6        | H-6           |
| 9                                   | 159.0           | -    | -                  | -                                 | -          | H-8           |
| 10                                  | 107.1           | -    | -                  | -                                 | -          | H-8, H-6, H-3 |
| 1'                                  | 123.1           | -    | -                  | -                                 | -          | -             |
| 2'                                  | 113.9           | H-2' | 7.39               | d, $J = 2.35$ Hz, 1H              | H-6'       | H-6'          |
| 3'                                  | 147.8           | -    | -                  | -                                 | -          | H-5'          |
| 4'                                  | 152.1           | -    | -                  | -                                 | -          | H-2', H-6'    |
| 5'                                  | 116.9           | H-5' | 6.88               | d, $J = 8.3$ Hz, 1H               | H-6'       | -             |
| 6'                                  | 120.7           | H-6' | 7.41               | dd, $J_1 = 8.3, J_2 = 2.3$ Hz, 1H | H-2', H-5' | H-2'          |
| <b><math>\beta</math>-D-Glucose</b> |                 |      |                    |                                   |            |               |

|     |       |        |      |                                    |               |              |
|-----|-------|--------|------|------------------------------------|---------------|--------------|
| 1'' | 101.8 | H-1''  | 5.07 | d, $J = 7.5$ Hz, 1H                | H-2''         | H-2''        |
| 2'' | 74.7  | H-2''  | 3.49 | t, $J=3.5$ Hz, 1H                  | H-1''         | H-4''        |
| 3'' | 71.3  | H-3''  | 3.41 | m, 1H                              | H-2'', H-4''  | -            |
| 4'' | 78.5  | H-4''  | 3.50 | m, (overlap), 1H                   | H-3''         | -            |
| 5'' | 77.9  | H-5''  | 3.56 | m, 1H                              | H-4'', H-6b'' | H-3'', H-4'' |
| 6'' | 62.5  | H-6a'' | 3.93 | dd, $J_1 = 12.3, J_2 = 2.3$ Hz, 1H | H-5'', H-6b'' | -            |
|     |       | H-6b'' | 3.72 | dd, $J_1 = 12.3, J_2 = 5.8$ Hz, 1H | H-5'', H-6a'' |              |

**Table S19:** NMR spectroscopic data of metabolite **27** (apigenin), (CD<sub>3</sub>OD, 500 MHz).

| #     | <sup>13</sup> C | HSQC      | $\delta$ <sup>1</sup> H | Multiplicity, ( $J$ , Hz) | COSY      | HMBC                |
|-------|-----------------|-----------|-------------------------|---------------------------|-----------|---------------------|
| 2     | 166.3           | -         |                         | -                         | -         | H-3, H-2'/H-6'      |
| 3     | 103.8           | H-3       | 6.60                    | s, 1H                     | -         | -                   |
| 4     | 183.9           |           |                         |                           |           | H-3                 |
| 5     | 163.2           |           |                         |                           |           | H-6                 |
| 6     | 100.2           | H-6       | 6.21                    | d, $J = 2.1$ Hz, 1H       | H-8, H-3  | H-8                 |
| 7     | 166.1           |           |                         |                           |           | H-2'/H-6, H-3, H-8  |
| 8     | 95.1            | H-8       | 6.46                    | d, $J = 2.1$ Hz, 1H       | H-6, H-3  | H-6                 |
| 9     | 159.4           | -         |                         | -                         | -         | H-8                 |
| 10    | 105.3           | -         |                         | -                         | -         | H-3, H-6, H-8       |
| 1'    | 123.3           | -         |                         | -                         | -         | H-3, H-3'/H-5'      |
| 2'/6' | 129.5           | H-2'/H-6' | 7.84                    | d, $J = 8.7$ Hz, 2H       | H-3'/H-5' | H-2'/H-6'           |
| 3'/5' | 117.0           | H-3'/H-5' | 6.93                    | d, $J = 8.7$ Hz, 2H       | H-2'/H-6' | H-3'/H-5'           |
| 4'    | 162.8           | -         |                         | -                         | -         | H-2'/H-6, H-3'/H-5' |

**Table S20:** NMR spectroscopic data of metabolite **28** (apigenin-7-O- $\beta$ -D-glucoside), (CD<sub>3</sub>OD, 500 MHz).

| #             | <sup>13</sup> C | HSQC | $\delta$ <sup>1</sup> H | Multiplicity, ( $J$ , Hz) | COSY       | HMBC |
|---------------|-----------------|------|-------------------------|---------------------------|------------|------|
| Flavone group |                 |      |                         |                           |            |      |
| 2             | 166.8           | -    | -                       | -                         | H-2', H-6' | -    |
| 3             | 104.0           | H-3  | 6.67                    | s, 1H                     | -          | -    |

| #                  | <sup>13</sup> C | HSQC       | δ <sup>1</sup> H | Multiplicity, (J, Hz)                                  | COSY         | HMBC                      |
|--------------------|-----------------|------------|------------------|--------------------------------------------------------|--------------|---------------------------|
| 4                  | 184.1           | -          | -                | -                                                      | -            | -                         |
| 5                  | 159.0           | -          | -                | -                                                      | -            | -                         |
| 6                  | 101.2           | H-6        | 6.50             | d, J = 2.2 Hz, 1H                                      | H-8          | -                         |
| 7                  | 164.9†          | -          | -                | -                                                      | -            | H-6                       |
| 8                  | 96.2†           | H-8        | 6.83             | d, J = 2.2 Hz, 1H                                      | H-6          | -                         |
| 9                  | 162.8           | -          | -                | -                                                      | -            | H-6                       |
| 10                 | 107.1           | -          | -                | -                                                      | -            | H-6, H-3                  |
| 1'                 | 123.1           | -          | -                | -                                                      | -            | H-3, H-3', H-5'           |
| 2'/ 6'             | 129.7           | H-2', H-6' | 7.89             | d, J = 8.7 Hz, 2H                                      | H-3', H-5'   | -                         |
| 3'/ 5'             | 117.2           | H-3', H-5' | 6.93             | d, J = 8.7 Hz, 2H                                      | H-2', H-6'   | -                         |
| 4'                 | 162.9‡          | -          | -                | -                                                      | -            | H-2', H-6',<br>H-3', H-5' |
| <b>β-D-Glucose</b> |                 |            |                  |                                                        |              |                           |
| 1''                | 101.6           | H-1''      | 5.07             | d, J = 7.5 Hz, 1H                                      | H-2'', H-3'' | -                         |
| 2''                | 74.7            |            | 3.50             | m, 1H                                                  | *            | -                         |
| 3''                | 77.9            |            | 3.42             | m, 1H                                                  | *            | -                         |
| 4''                | 71.3            |            | 3.49             | m, (overlap), 1H                                       | *            | -                         |
| 5''                | 78.4            |            | 3.56             | m, 1H                                                  | *            | -                         |
| 6''                | 62.6            | 6a''       | 3.71             | dd, J <sub>1</sub> = 12.1, J <sub>2</sub> = 2.2 Hz, 1H | 6b''         | -                         |
|                    |                 | 6b''       | 3.93             | dd, J <sub>1</sub> = 12.1, J <sub>2</sub> = 6.0 Hz, 1H | 6a''         |                           |

\*Unclear due to overlapping; ‡ The correlation was done by HSQC, HMBC.

**Table S21:** NMR spectroscopic data of metabolite **29** (diosmetin-7-O-β-D-glucoside), (CD<sub>3</sub>OD, 500 MHz).

| #                    | <sup>13</sup> C | HSQC | δ <sup>1</sup> H | Multiplicity, (J, Hz) | COSY | HMBC               |
|----------------------|-----------------|------|------------------|-----------------------|------|--------------------|
| <b>Flavone group</b> |                 |      |                  |                       |      |                    |
| 2                    | 164.8           | -    | -                | -                     | -    | H-3, H-2',<br>H-6' |
| 3                    | 104.5           | H-3  | 6.70             | s, 1H                 | -    | -                  |
| 4                    | 184.4           | -    | -                | -                     | -    | -                  |
| 5                    | 159.2           | -    | -                | -                     | -    | H-8                |

| #                    | <sup>13</sup> C | HSQC                  | δ <sup>1</sup> H | Multiplicity, (J, Hz)                                  | COSY          | HMBC                                 |
|----------------------|-----------------|-----------------------|------------------|--------------------------------------------------------|---------------|--------------------------------------|
| 6                    | 101.3           | 6                     | 6.50             | d, J = 2.3 Hz, 1H                                      | H-6           | H-8                                  |
| 7                    | 168.8           | -                     | -                | -                                                      | -             | -                                    |
| 8                    | 96.2*           | 8                     | 6.86             | d, J = 2.3 Hz, 1H                                      | H-8           | H-6                                  |
| 9                    | 156.7*          | -                     | -                | -                                                      | -             | H-8                                  |
| 10                   | 104.5           | -                     | -                | -                                                      | -             | -                                    |
| 1'                   | 123.4           | -                     | -                | -                                                      | -             | H-2'                                 |
| 2'                   | 110.9           | 2'                    | 7.52             | d, J = 2.0 Hz, 1H                                      | H-6'          | H-6'                                 |
| 3'                   | 147.8           | -                     | -                | -                                                      | -             | -                                    |
| 4'                   | 150.9*          | -                     | -                | -                                                      | -             | H-2', H-5',<br>H-4' OCH <sub>3</sub> |
| 5'                   | 116.9           | -                     | 6.94             | d, J = 8.3 Hz, 1H                                      | H-6'          | -                                    |
| 6'                   | 122.1           | 6'                    | 7.56             | dd, J <sub>1</sub> = 8.3, J <sub>2</sub> = 2.0 Hz, 1H  | H-2', H-5'    | H-2'                                 |
| 4' -OCH <sub>3</sub> | 56.7            | H-4' OCH <sub>3</sub> | 3.97             | s, 3H                                                  | -             | -                                    |
| <b>β-D-Glucose</b>   |                 |                       |                  |                                                        |               |                                      |
| 1''                  | 101.6*          | 1''                   | 5.08             | br.d J = 7.5 Hz, 1H                                    | H-2''         | -                                    |
| 2''                  | 74.8            | 2''                   | 3.50             | t, J = 3.5 Hz, 1H                                      | H-1''         | H-4''                                |
| 3''                  | 71.3            | 3''                   | 3.40             | m, 1H                                                  | H-2''         | -                                    |
| 4''                  | 78.4            | 4''                   | 3.49             | m, (overlap), 1H                                       | H-3'', H-5''  | H-2''                                |
| 5''                  | 77.9            | 5''                   | 3.56             | m, 1H                                                  | H-4'', H-6a'' | H-4'', H-3''                         |
| 6''                  | 62.5            | 6a''                  | 3.71             | dd, J <sub>1</sub> = 12.2, J <sub>2</sub> = 6.0 Hz, 1H | H-5'', H-6b'' | -                                    |
|                      |                 | 6b''                  | 3.93             | dd, J <sub>1</sub> = 12.2, J <sub>2</sub> = 2.2 Hz, 1H | H-6a''        | -                                    |

\*The correlation was done by HSQC, HMBC.

**Table S22:** NMR spectroscopic data of metabolite **30** (docos-1-ene), (CDCl<sub>3</sub> 500 MHz)

| # | <sup>13</sup> C | HSQC | DEPT 135        | δ <sup>1</sup> H | Multiplicity, (J, Hz)                                                             | COSY              | HMBC |
|---|-----------------|------|-----------------|------------------|-----------------------------------------------------------------------------------|-------------------|------|
| 1 | 114.0           | H-1a | CH <sub>2</sub> | 4.99             | ddd,<br>J <sub>1</sub> = 17.0, J <sub>2</sub> = 3.5, J <sub>3</sub> = 1.5 Hz, 1H  | H-2               | H-3  |
|   |                 | H-1b |                 | 4.92             | ddd,<br>J <sub>1</sub> = 10.0, J <sub>2</sub> = 3.5, J <sub>3</sub> = 1.5 Hz, 1H  | H-2               |      |
| 2 | 139.2           | H-2  | CH              | 5.81             | ddt,<br>J <sub>1</sub> = 17.0, J <sub>2</sub> = 10.0, J <sub>3</sub> = 5.0 Hz, 1H | H-3,<br>H-1a, H1b | H-3  |

|      |      |        |                                  |      |                                                   |      |                    |
|------|------|--------|----------------------------------|------|---------------------------------------------------|------|--------------------|
| 3    | 33.8 | H-3    | CH <sub>2</sub>                  | 2.04 | tdd,<br>$J_1 = 14.5, J_2 = 8.0, J_3 = 1.5$ Hz, 2H | H-2  | H-1a, H-1b,<br>H-2 |
| 4-18 | 29.7 | H-4/18 | (CH <sub>2</sub> ) <sub>15</sub> | 1.25 | br.s. 30H                                         | -    | -                  |
| 19   | 29.1 | H-19   | CH <sub>2</sub>                  | 1.37 | q, $J = 7.1$ Hz, 2H                               | -    | -                  |
| 20   | 31.9 | H-20   | CH <sub>2</sub>                  | 1.29 | m, 2H                                             | -    | H-21, H-22         |
| 21   | 22.6 | H-21   | CH <sub>2</sub>                  | 1.31 | br. q, $J = 7.0$ Hz, 2H                           | H-22 | H-22               |
| 22   | 14.1 | H-22   | CH <sub>3</sub>                  | 0.88 | t, $J = 7.0$ Hz, 3H                               | H-21 | H-21               |

**Note S1:** NMR data of metabolite **11**, (CD<sub>3</sub>OD, 500 MHz)

p-coumaric acid: <sup>1</sup>H NMR (CD<sub>3</sub>OD, 500 MHz)  $\delta$ : 7.52 (d,  $J = 16.0$  Hz, 1H, H-7), 7.42 (d,  $J = 8.7$  Hz, 2H, H-2/6), 6.80 (d,  $J = 8.7$  Hz, 2H, H-3/5), 6.29 (d,  $J = 16.0$  Hz, 1H, H-8). <sup>13</sup>C-NMR (500 MHz, CD<sub>3</sub>OD)  $\delta$ : 171.1 (C-9), 161.2 (C-4), 146.6 (C-7), 131.1 (C-2, 6), 127.3 (C-1), 116.8 (C-3, 5), 115.7 (C-8).

**Note S2:** NMR data of metabolite **12**, (CD<sub>3</sub>OD, 500 MHz)

Caffeic acid: <sup>1</sup>H-NMR (CD<sub>3</sub>OD, 500 MHz)  $\delta$  7.02 (d,  $J = 2.0$  Hz, 1H, H-2), 6.76 (d,  $J = 8.0$  Hz, 1H, H-5), 6.91 (dd,  $J_1 = 8.0, J_2 = 2.0$  Hz, 1H, H-6), 7.51 (d,  $J = 16.0$  Hz, 1H, H-7), 6.23 (d,  $J = 16.0$  Hz, 1H, H-8).

**Note S3:** NMR data of metabolite **15**, (CD<sub>3</sub>OD, 500 MHz)

5,7-dihydroxychromone: <sup>1</sup>H NMR (CD<sub>3</sub>OD, 500 MHz),  $\delta$ : 7.96 (d,  $J = 6.0$  Hz, 1H, H-2), 6.18 (d,  $J = 6.0$  Hz, 1H, H-3), 6.19 (d,  $J = 2.0$  Hz, 1H, H-6), 6.32 (d,  $J = 2.0$  Hz, 1H, H-8).

**Note S4:** NMR data of metabolite **17**, (CD<sub>3</sub>OD, 500 MHz)

Gallic acid: <sup>1</sup>H NMR (CD<sub>3</sub>OD, 500 MHz),  $\delta$ : 7.1 (s, 2H, H-2 / H-6). <sup>13</sup>C NMR (500 MHz, CD<sub>3</sub>OD),  $\delta$ : 171.2 (C-7) 146.4 (C-3 / C-5), 139.4 (C-4), 123.1 (C-1) 110.3 (C-2 / C-6).

**Note S5:** NMR data of metabolite **18**, (CD<sub>3</sub>OD, 500 MHz)

Vanillic acid :<sup>1</sup>H-NMR (CD<sub>3</sub>OD, 500 MHz)  $\delta$  7.54 (d,  $J = 2.0$  Hz, 1H, H-2), 7.55 (dd,  $J_1 = 8.7, J_2 = 2.0$  Hz, 1H, H-6), 6.84 (d,  $J = 8.7$  Hz, 1H, H-5), 3.89 (s, 3H). <sup>13</sup>C-NMR (500 MHz, CD<sub>3</sub>OD):  $\delta$  170.1 (COOH), 152.7 (C-3), 148.7 (C-4), 125.3 (C-6), 123.1 (C-1), 115.9 (C-2), 113.8 (C-5), 56.4 (C-8, OCH<sub>3</sub>).

**Note S6:** NMR data of metabolite **20**, (CD<sub>3</sub>OD, 500 MHz)

Eriodyctiol: <sup>1</sup>H-NMR (CD<sub>3</sub>OD, 500 MHz),  $\delta$ : 6.91 (brd,  $J = 1.5$ , 1H, H-2'), 6.77 (d,  $J = 1.5$  Hz, 1H, H-5'), 6.81 (m, 1H, H-6') 5.89 (d,  $J = 2.1$  Hz, 1H, H-8), 5.87 (d,  $J = 2.1$  Hz, 1H, H-6), 5.28 (dd,  $J_1 = 13.0, J_2 = 3.0$  Hz, 1H, H-2), 3.06 (dd,  $J_1 = 17.2, J_2 = 12.8$  Hz, 1H, H<sub>ax</sub>-3), 2.69 (dd,  $J_1=17.2, J_2 = 3.1$  Hz, 1H, H<sub>eq</sub>-3).
